1 **Lactation curve model with explicit representation of perturbations as a phenotyping**  
2 **tool for dairy livestock precision farming.**

3

4 Ben Abdelkrim Ahmed<sup>1,2</sup>, Puillet Laurence<sup>1</sup>, Gomes Pierre<sup>1,3</sup>, Martin Olivier<sup>1</sup>

5 <sup>1</sup> UMR MoSAR, INRA, AgroParisTech, Université Paris-Saclay, 75005, Paris, France

6 <sup>2</sup> GABI, INRA, AgroParisTech, Université Paris-Saclay, 78350, Jouy-en-Josas, France

7 <sup>3</sup> NEOVIA, 56250, Saint-Nolff, France

8 **About the Authors**

9

10 Ahmed Ben Abdelkrim: Conceptualization, Methodology, Visualization, Software  
11 implementation, Writing – Original draft preparation

12 Laurence Puillet: Conceptualization, Data curation, Writing – review & editing

13 Pierre Gomes: Conceptualization, Methodology, Preliminary tests

14 Olivier Martin: Conceptualization, Supervision, Writing – review & editing

15 **Data Availability:**

16 All relevant data are within the paper and its Supporting Information files. The R code for the  
17 Perturbed Lactation Model is available under request for academic purposes.

18 **Funding:**

19 This work was funded by the Deffilait national project (ANR-15-CE20-0014).

20 **Competing interests:**

21 The authors have declared that no competing interests exist.

22 **Keywords**

23 Dairy Goats, Milk Yield, Individual Variability, Resilience

## 24 **Abstract**

## 25 **Background**

26 Understanding the effects of environment on livestock provides valuable information on how  
27 farm animals express their production potential, and on their welfare. Ruminants are often  
28 confronted with perturbations that affect their performance. Evaluating the effect of these  
29 perturbations on animal performance could provide metrics to quantify how animals cope  
30 with their environment and therefore better manage them. In dairy systems, milk production  
31 records can be used to evaluate this effect because (1) they are easily accessible, (2) the  
32 overall dynamics throughout the lactation process have been widely described, and (3)  
33 perturbations often occur and cause milk loss. In this study, a lactation curve model with  
34 explicit representation of perturbations was developed.

## 35 **Methods**

36 The perturbed lactation model is composed of two components. The first one describes a  
37 theoretical unperturbed lactation curve (unperturbed lactation model), and the second  
38 describes deviations from the unperturbed lactation model. The model was fitted on 319  
39 complete lactation data from 181 individual dairy goats allowing the characterization of  
40 individual perturbations in terms of their starting date, intensity, and shape.

## 41 **Results**

42 The fitting procedure detected a total of 2354 perturbations with an average of 7.40  
43 perturbations per lactation. Loss of production due to perturbations varied between 2 % and  
44 19 %. Results show that it is not the number of perturbations is not the major factor  
45 explaining the loss in milk yield over the lactation, suggesting that there are different types of  
46 animal response to disturbing factors.

## 47 **Conclusions**

48 By incorporating explicit representation of perturbations, the model allowed the  
49 characterization of potential milk production, deviations induced by perturbations, and  
50 thereby comparison between animals. These indicators are likely to be useful to move from  
51 raw data to decision solutions in dairy production.

## 52 INTRODUCTION

53 In the context of precision livestock farming, simple interpretive tools are required to convert  
54 raw time series datasets, now routinely recorded in animals, into useful information for on-  
55 farm decision-making. Such tools are not only expected to provide farmers with good  
56 information on performance level of individual animals, but also to detect pathological,  
57 nutritional or environmental problems affecting production traits at individual or herd scales.  
58 In dairy systems, it is well known that milk yield can be affected by problems such as udder  
59 health problems [1], lameness [2], heat stress [3] or nutritional challenges [4]. Such problems  
60 induce perturbations in the course of the lactation process and result in a serrated shape  
61 pattern in the lactation curve. These perturbations can be seen as deviations of the lactation  
62 curve from its typical profile. This typical profile reflects that lactation is a physiological  
63 process common to mammal females and as a result, its expression through time follows a  
64 general pattern [5]. It can be described in 3 phases. The first phase starts after parturition with  
65 the initial milk yield increasing to a maximum or peak yield. The second phase is a plateau-  
66 like period in which milk yield is maintained for a more or less long time. The third phase is  
67 the decrease from the peak yield. This last phase can be divided into two parts according to  
68 the speed of decrease, the first one corresponding to an approximately constant declining rate  
69 of milk production after the peak yield and the second corresponding to an acceleration of the  
70 decline as pregnancy progresses before the start of the dry period when lactation stops [6–8].  
71 Modelling the lactation curve is a long standing issue [9] and numerous authors have  
72 proposed mathematical models allowing the characterization of milk yield dynamics, *i.e.*, the  
73 transformation of a series of temporal data into a vector of estimated parameters via a fitting  
74 procedure. The most famous and most used model is the one of Wood published in 1967 [10].  
75 The overall objective of lactation models is to reduce the variability or noise in data by  
76 extracting a profile and therefore being able to characterize an average animal milk

77 production or to compare the production of different animals. This strategy of using lactation  
78 models as phenotyping tools has been very useful in the past years (for instance, test-day  
79 models for genetic selection) and in a context of scarce raw data. An important limitation of  
80 these modelling approaches is that short-term perturbations are removed during fitting  
81 procedure in order to extract an unperturbed phenotype, corresponding to a typical lactation  
82 curve. However, characterizing perturbations can be highly relevant for better understanding  
83 the resilience of milk production and for making management decisions. Evaluating the effect  
84 of perturbations on animal performance could provide metrics to quantify how animals cope  
85 with their environment, and therefore better manage them. Taking into account this type of  
86 information can provide a proxy to estimate the frequency and severity of disorders such as  
87 clinical mastitis [11]. Studying perturbations in lactation curves also makes it possible to  
88 compare animals facing the same stress and detect the ones with the greatest adaptive  
89 capacities. Finally, the on-farm early detection of perturbations in milk yield can provide  
90 farmers with an alert system on udder health. Recently, Huybrechts et al. [12] tested and  
91 developed the synergistic control concept for early detection of anomalies in dairy cows based  
92 on detection of shifts in milk yield per hour. Of the 49 mastitis cases, 31 cases were detected  
93 using this methodology at the same time or earlier than they were detected by the farmer.

94 The need for incorporating perturbations into lactation curve models is also driven by the  
95 development of precision livestock farming. Now, we have more frequent and reliable data  
96 and we can move from the logic of reducing variability around average profiles to the logic of  
97 extracting variability to provide information as such. High throughput data has led to the  
98 development and use of statistical methods to understand perturbations (*e.g.* Codrea et al.  
99 [13]). However, such smoothing methods are limited by their lack of an a priori representation  
100 of the typical "unperturbed" lactation curve. As such, the quantification of perturbations in  
101 such models is underestimated, especially for perturbations of long duration. A final

102 limitation of these purely statistical methods is that the model coefficients in themselves do  
103 not have direct biological meaning. There is thus a lack of tools for phenotyping milk  
104 production with a systemic representation of perturbations.  
105 We developed a Perturbed Lactation Model (PLM) that incorporates an explicit representation  
106 of perturbations and that converts individual raw time-series data into biological meaningful  
107 parameters. The fitting procedure of PLM allows the detection and the characterization of  
108 perturbations in milk time-series. The objective of the present paper is (1) to introduce the  
109 PLM model and the explicit representation of perturbations, (2) to describe the use of PLM to  
110 detect and characterize perturbations in milk yield time series with an example in dairy goats,  
111 and (3) to illustrate the role of PLM as a phenotyping tool by analyzing the variability in  
112 perturbed lactation curves on the basis of the fitting results obtained on the dairy goat dataset.

## 113 MATERIALS AND METHODS

114 The Perturbed Lactation Model (PLM) is composed of a lactation model, denoted  $Y^*$ ,  
115 describing the theoretical unperturbed dynamics of milk yield along the lactation, and a  
116 perturbation model, denoted  $\pi$ , describing deviations from the lactation model.

117 The dynamics of daily milk yield ( $Y(t)$ , in kg) during the lactation is thus given by:

$$118 \quad Y(t) = Y^*(t) \cdot \pi(t)$$

119 where  $t$  is the time after parturition in days.

### 120 Unperturbed lactation model

121 Among the numerous mathematical models developed to study lactation curves, the  
122 incomplete Gamma function proposed by Wood [10] has been widely used in different  
123 mammals (*e.g.* rabbits [14], sheep [15]). This model gives a general expression for the  
124 dynamics of milk yield along the lactation. In this article, we have selected this model as an  
125 example to define the unperturbed lactation curve. Because the structure of PLM is generic,  
126 any other lactation model can be used.

127 The Wood model is given by:

$$128 \quad Y^*(t) = a \cdot t^b \cdot e^{-c \cdot t}$$

129 where  $Y^*(t)$  is the unperturbed daily milk yield in kg,  $t$  is the time in days after parturition  
130 and  $a$ ,  $b$ ,  $c$  are positive parameters that determine the shape of the lactation curve ( $a$  scales the  
131 general level of the curve,  $b$  controls the type and magnitude of the curvature of the function,  
132 and  $c$  regulates the rate of decrease in milk yield after the lactation peak). Values of these  
133 parameters can be used to calculate some essential features of the lactation curve such as the  
134 time of peak yield ( $b/c$ , in days), the lactation persistency, *i.e.*, the extent to which peak yield  
135 is maintained ( $-(b + 1) \cdot \ln(c)$  in  $\text{kg} \cdot \text{d}^{-1}$ ), or the peak yield ( $a \cdot (b/c)^b \cdot e^{-b}$  in kg)[16].

### 136 Perturbation model

137 The perturbation model is based on the idea that each single perturbation  $I$  affecting lactation  
 138 dynamics can be described as a transient proportional decrease in milk yield, through a  
 139 sequence of collapse and recovery. Each perturbation can thus be modelled by way of a 3-  
 140 compartment model (Figure 1) representing the dynamics of the proportion of milk withdrawn  
 141 from the theoretical unperturbed yield.

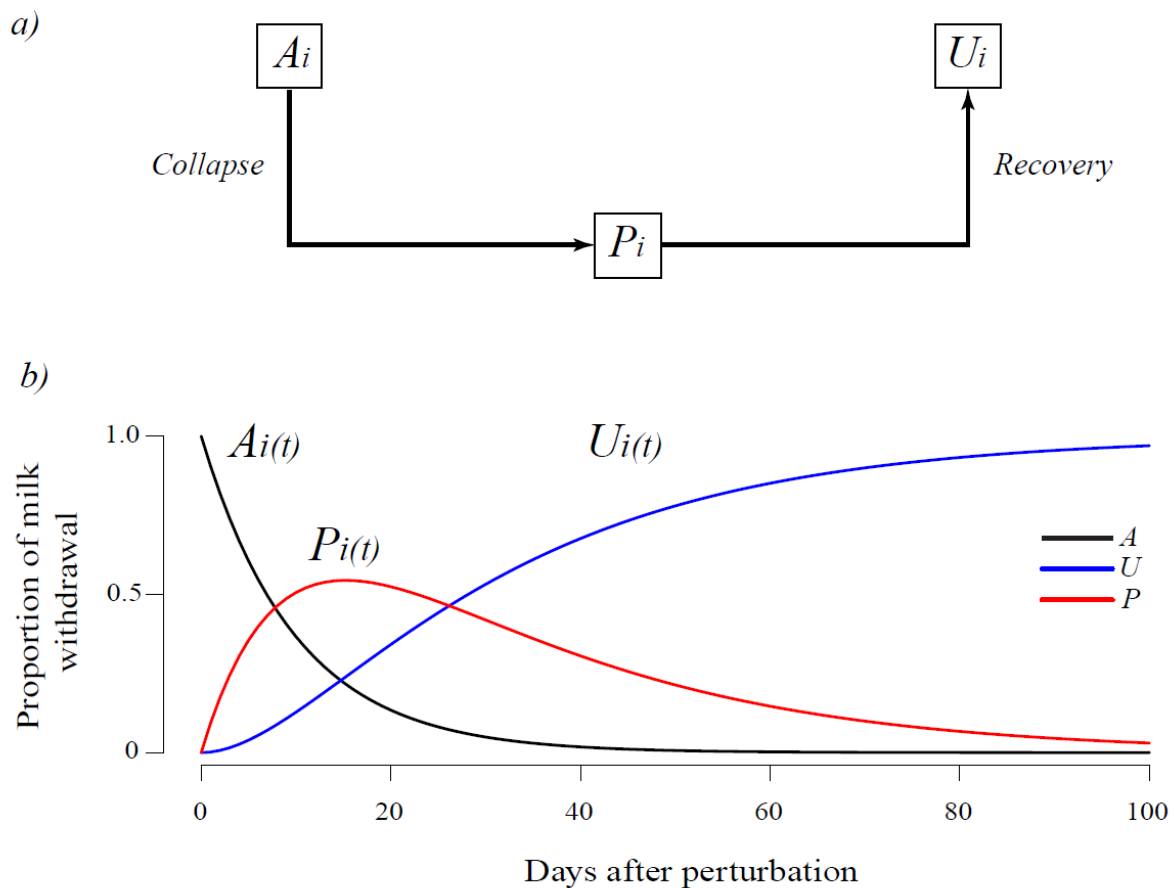

142

143 Figure 1. Conceptual model of a single perturbation. A: proportion affected by the  
 144 perturbation, P: proportion effectively affected by the perturbation, U: proportion unaffected  
 145 by the perturbation. a) Model diagram and b) Solution dynamics.

146 The three compartments of the model are:  $A_i$ , the maximal proportion potentially affected by  
 147 the  $i^{th}$  perturbation,  $U_i$ , the proportion unaffected by the  $i^{th}$  perturbation, and  $P_i$ , the proportion  
 148 effectively affected by the  $i^{th}$  perturbation. Given the structure of the compartmental model,  
 149 forming a path from  $A_i$  to  $U_i$  through  $P_i$ , and given that the model is defined such as  $A_i + P_i +$   
 150  $U_i = 1$ , the dynamics of  $P_i$  represents the proportional deviation in milk yield.



151 The perturbation model for a single perturbation  $i$  is defined by the following simple  
 152 differential system:

$$153 \quad \text{if } t \geq t_{P_i}: \begin{cases} \frac{dA_i}{dt} = -k_{1,i} \cdot A_i \\ \frac{dP_i}{dt} = +k_{1,i} \cdot A_i - k_{2,i} \cdot P_i \\ \frac{dU_i}{dt} = +k_{2,i} \cdot P_i \end{cases} \text{ otherwise: } \begin{cases} \frac{dA_i}{dt} = 0 \\ \frac{dP_i}{dt} = 0 \\ \frac{dU_i}{dt} = 0 \end{cases}$$

154

155 with the following initial conditions at parturition time ( $t = 0$ ):

$$156 \quad \begin{cases} A_i(0) = k_{0,i} \\ P_i(0) = 0 \\ U_i(0) = 1 - k_{0,i} \end{cases}$$

157 and where  $t_{P_i}$  is the time of start of the  $i^{\text{th}}$  perturbation,  $k_{0,i}$  is the parameter of intensity of the  
 158  $i^{\text{th}}$  perturbation ( $k_{0,i} \in ]0; 1]$ ),  $k_{1,i}$  is the parameter of collapse speed of the  $i^{\text{th}}$  perturbation and  
 159  $k_{2,i}$  is the parameter of recovery speed of the  $i^{\text{th}}$  perturbation.

160 Assuming that  $k_{1,i} \neq k_{2,i}$ , the algebraic solution of this differential system is given by:

$$161 \quad \begin{cases} A_i(t) = k_{0,i} \cdot e^{-k_{1,i} \cdot \Delta_i(t)} \\ P_i(t) = \frac{k_{0,i} \cdot k_{1,i}}{k_{1,i} - k_{2,i}} \cdot (e^{-k_{2,i} \cdot \Delta_i(t)} - e^{-k_{1,i} \cdot \Delta_i(t)}) \\ U_i(t) = 1 - \frac{k_{0,i}}{k_{1,i} - k_{2,i}} \cdot (k_{1,i} \cdot e^{-k_{2,i} \cdot \Delta_i(t)} - k_{2,i} \cdot e^{-k_{1,i} \cdot \Delta_i(t)}) \end{cases}$$

162 Where  $\Delta_i(t)$  is the elapsed time since the beginning of the  $i^{\text{th}}$  perturbation and is given by:

$$163 \quad \Delta_i(t) = \begin{cases} 0 & \text{if } t < t_{P_i} \\ t - t_{P_i} & \text{if } t \geq t_{P_i} \end{cases}$$

164 Finally, the perturbation model, including  $n$  individual perturbations affecting the lactation  
 165 curve is given by:

$$166 \quad \pi(t) = \prod_{i=1}^n (1 - P_i(t))$$

167

168 **Model Formalism**

169 The detailed algebraic formula of PLM with  $n$  individual perturbations is given by:

170 
$$Y(t) = a \cdot t^b \cdot e^{-c \cdot t} \cdot \prod_{i=1}^n \left( 1 - \frac{k_{0,i} \cdot k_{1,i}}{k_{1,i} - k_{2,i}} \cdot (e^{-k_{2,i} \cdot \Delta_i(t)} - e^{-k_{1,i} \cdot \Delta_i(t)}) \right)$$

171 The model includes the three parameters of the Wood model ( $a$ ,  $b$ , and  $c$ ) to define the  
 172 unperturbed lactation curve, one parameter to define the number of perturbations affecting the  
 173 lactation curve ( $n$ ), and four parameters per individual perturbation  $i$  ( $t_{P_i}$ ,  $k_{0,i}$ ,  $k_{1,i}$ , and  $k_{2,i}$ )  
 174 so that the total number of parameters to define PLM is equal to  $4 + 4 \cdot n$ .

175 A simulation of PLM with five perturbations over 300 days of lactation is shown in Figure 2  
 176 as an illustration of the model behavior.

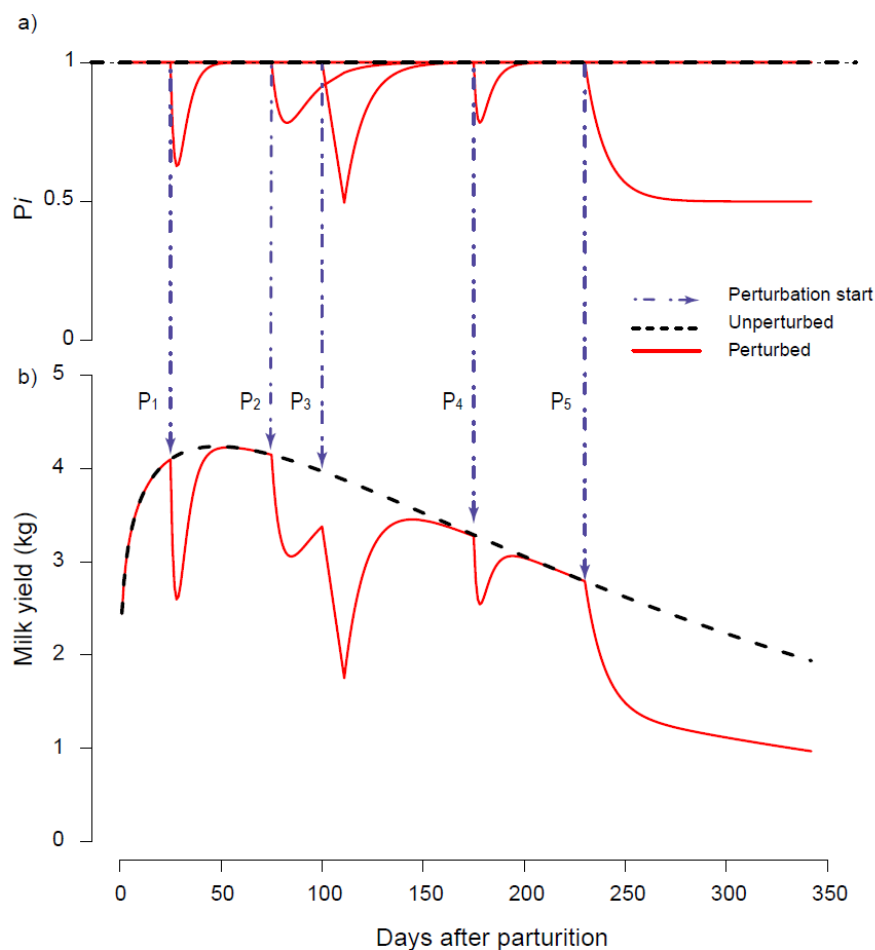

177

178 Figure 2. Example of a simulation of the Perturbed Lactation Model (PLM) including five  
 179 perturbations with a) individual perturbations dynamics expressed as the proportion of  
 180 unperturbed lactation curve ( $P_i$ ) and b) unperturbed and perturbed milk yield dynamics.

181 Perturbations are considered individually, so that a perturbation can occur within another one  
182 (see  $P_3$  in Figure 2  $att_{P_3} = 100$ ). Given that individual perturbations are proportional  
183 deviations multiplied between them, when a perturbation is added during another  
184 perturbation, the new perturbation is a proportion of the already perturbed curve. Moreover,  
185 perturbations can be used to simulate the effect of pregnancy (see  $P_5$  in Figure 2  $att_{P_5} = 225$ )  
186 with the recovery parameter  $k_{2,i}$  set to zero.

### 187 **Fitting procedure**

188 PLM is aimed at detecting perturbations in milk yield time-series data and thus provide  
189 estimates of (1) a theoretical unperturbed lactation curve and (2) the number, timing and  
190 shape of the perturbations leading to the observed perturbed lactation curve. A dedicated  
191 algorithm was developed in R (R Core Development Team, 2018) with the aim of fitting PLM  
192 on lactation data and deriving parameter estimates  $a$ ,  $b$ , and  $c$  to characterize the unperturbed  
193 lactation curve,  $n$  to define the number of perturbation and parameter estimates  
194  $(t_{P_i}, k_{0,i}, k_{1,i}, \text{ and } k_{2,i})$  for each  $i^{th}$  detected perturbation. Preliminary tests have shown that  
195 repeated fittings using different starting values can lead to the detection of perturbations  
196 differing in total number and detection order. This raised the question of the theoretical  
197 identifiability of the model parameters (for further details on identifiability see [17]) and of  
198 the use of a stop criterion to estimate  $n$ . The structure of the model does not allow a classical  
199 identifiability analysis to be performed if  $n$  is unknown. However, by using the software  
200 DAISY (Differential Algebra for Identifiability of Systems[18]), we could assess that for one  
201 perturbation the PLM parameters are locally identifiable. To facilitate the identification of the  
202 model parameters, we adopted a fitting strategy in two steps: first, performing numerous  
203 repeated fittings to estimate the most frequent number of perturbations. In the second step, we  
204 fixed as known the number of perturbations detected in step 1 and proceed to estimate the

205 remaining parameters of the model. This strategy ultimately makes it possible to estimate an  
206 optimal number of perturbations and facilitates the estimation of the model parameters.

207 In the following section,  $PLM_n$  stands for PLM with  $n$  perturbations,  $k_{W_n}$  stands for the  
208 triplet of parameters  $(a, b, c)$  of Wood's model estimated with  $n$  perturbations ( $n$  ranging from  
209 0 to  $n_{max}$ ) and  $k_{P_{i,n}}$  stands for the quadruplet  $(t_{P_i}, k_{0,i}, k_{1,i}, k_{2,i})$  of the  $i^{th}$  perturbation ( $n$   
210 ranging from 1 to  $n_{max}$ ).

211 The `nls.multstart` package [19] performing non-linear least squares regression with the  
212 Levenberg-Marquardt algorithm and with multiple starting values was used for each single fit.

213 Two different sampling schemes of starting parameters were used: random sampling of  
214 starting parameters from a uniform distribution within the starting parameter bounds or  
215 selection of combinations of starting parameters at equally spaced intervals across each of the  
216 starting parameter bounds. These two fitting methods are hereafter referred to as 'shotgun  
217 search' and 'gridstart search' respectively. Starting parameter bounds are defined as follows:

218  $a$ : [0; 100];  $b$ : [0; 1];  $c$ : [0; 1];  $t_{P_i}$ : [ $t_0$ ;  $t_3$ ] (where  $t_0$  and  $t_3$  are the times of first and last  
219 records of the dataset);  $k_{0,i}$ : [0; 1];  $k_{1,i}$ : [0; 10];  $k_{2,i}$ : [0; 10]. For the 'shotgun search', the  
220 number of random combinations of starting parameters was set to 100 000. For the 'gridstart  
221 search', the number of combinations of starting parameters (*i.e.*, the size of the grid), was set  
222 to five for parameters  $a, b, c, k_{0,i}, k_{1,i}, k_{2,i}$  and to 10 for the parameter  $t_{P_i}$ . Consequently, for  
223 the fit of one perturbation (*i.e.*, estimating  $3 + 4 = 7$  parameters) the number of tested  
224 combinations of starting parameters was  $7^6 \times 10 = 1176490$ . For both search methods, the best  
225 model was selected on the basis of the lowest Akaike Information Criterion (AIC) score [20].

226 The whole fitting procedure includes repetitions of a fitting sequence that proceeds by  
227 successive addition of perturbations. This fitting sequence is defined in such a way that the  
228 estimate of the parameters of each new perturbation is obtained while the parameters of the  
229 previously added perturbations are kept fixed. Therefore, the fitting of  $PLM_i$  provides

230 parameters estimates for the new added  $i^{th}$  perturbation and for a new version of Wood  
231 model's parameters  $k_{W_i}$  (*i.e.*, each time a new perturbation is added, a new version of the  
232 unperturbed lactation is refined). For a given lactation dataset composed of daily milk yield  
233 records, the preliminary fitting of PLM<sub>0</sub> (*i.e.*, the original Wood's model without any  
234 perturbation) was first performed to estimate  $k_{W_0}$ . Then, the fitting sequence starts by the  
235 fitting of PLM<sub>1</sub> (*i.e.*, PLM with 1 perturbation) thus providing estimates  $k_{W_1}$  and  $k_{P_{1,1}}$ . Then,  
236 the fitting of PLM<sub>2</sub> consists in estimating  $k_{W_2}$  and  $k_{P_{2,2}}$  with  $k_{P_{1,2}}$  fixed equal to  $k_{P_{1,1}}$ . Then,  
237 the fitting of PLM<sub>3</sub> consists in estimating  $k_{W_3}$  and  $k_{P_{3,3}}$  with  $k_{P_{1,3}}$  and  $k_{P_{2,3}}$  fixed equal to  
238  $k_{P_{1,2}}$  and  $k_{P_{2,2}}$ , respectively. The procedure is applied stepwise until the maximum number of  
239 perturbation  $n_{max}$  is reached. This maximum number is an *a priori* user defined value to fix a  
240 stop criterion. Preliminary tests have shown that setting  $n_{max} = 15$  was sufficient. The end of  
241 the fitting sequence consists in reordering the  $n_{max}$  detected perturbations in decreasing order  
242 according to the time of perturbation  $t_{P_i}$  (the original obtained order of perturbations is based  
243 on the opportunities found by the fitting procedure to improve the goodness of fit for each  
244 added perturbation).

245 Finally, the whole fitting procedure is carried out following the 3 following steps:

246 Step1: Repeat 100 times the fitting sequence with the 'shotgun search' and  $n_{max} = 15$ .

247 Step2: Compare the fitting results of the 100 repetitions obtained in step1 and identify  
248 perturbations systematically detected at  $t_{P_i} \pm 3$  days. This was performed by counting, for the  
249 15 perturbations over the 100 fitting results, the number of occurrences of the rounded  
250 value  $t_{P_i}^* = round(t_{P_i}/7) \cdot 7$ . This step provides the optimal number of perturbations  
251 denoted  $N$  with an estimate of  $t_{P_i}$  for each perturbation (calculated as the median of the  
252  $t_{P_i}$  with the same rounded value  $t_{P_i}^*$ ).

253 Step3: Perform the fitting sequence with the ‘gridstart search’, with  $n_{max} = N$  and with  
254 starting parameters bounds for each  $t_{P_i}$  reset to  $[t_{P_i} - 10 ; t_{P_i} + 10]$ . This last fit provides the  
255 final estimates  $k_{W_N}$  and  $(k_{P_{1,N}}, \dots, \text{and } k_{P_{N,N}})$  characterizing respectively the best fit for the  
256 unperturbed model and the  $N$  detected perturbations. The Root Mean Square Error was  
257 calculated to indicate the goodness-of-fit of PLM<sub>N</sub>. Additionally, the percentage of loss ‘ $L$ ’  
258 was calculated using the formula  $L = 1 - S_0/S_N$  where  $S_0$  and  $S_N$  are the total milk yield  
259 over  $[t_0; t_3]$  calculated with Wood’s model without perturbation using parameters  $a$ ,  $b$  and  $c$   
260 from PLM<sub>N</sub> and PLM<sub>N</sub> (i.e., Wood’s model with  $N$  perturbations).

261 To provide complementary information on lactation time-series and refine PLM outputs  
262 analysis, the model of Grossman et al. [21] was also fit to lactation data as described in Martin  
263 and Sauvant [22]. This fitting cuts the lactation period into three stages corresponding to  
264 early, middle and late stages (respectively intervals  $[t_0; t_1]$ : increasing phase,  $[t_1; t_2]$ : plateau-  
265 like phase and  $[t_2; t_3]$ : decreasing phase). This triphasic model, based on a smoothing logistic  
266 transition between intersecting straight lines, specifies the cut points of the three stages  
267 (instead of a priori number of days in milk). This fit was performed using the ‘gridstart  
268 search’ with  $[t_0; t_3]$  as starting parameters bounds for the interval terminals  $t_1$  and  $t_2$ .

### 269 **Dairy goat dataset**

270 In this study we used data from 319 lactations (126 primiparous and 193 multiparous; parity  
271 ranging from 1 to 7) including 80773 milk records from the dairy goat herd of the INRA-  
272 AgroParisTech Systemic Modelling Applied to Ruminants research unit (Paris, France)  
273 between 2015 and 2018. Data concerned 181 goats (94 Alpine and 87 Saanen) born between  
274 2009 and 2017. Records are shown in supplementary Figure 1 by breed and parity. All  
275 lactations considered had at least one record in the first 5 days of lactation and a last record  
276 between 150 and 350 days of lactation (no extended lactation included).

277

278 **Statistical analysis**

279 All statistical analyses were performed using R (R Core Development Team, 2018).  
280 Fixed effects of breed (Saanen *vs.* Alpine) and parity (1 *vs.* 2 and more) were tested on root  
281 mean square error (RMSE), on parameters  $a$ ,  $b$ , and  $c$ , on estimated peak milk yield, peak time  
282 and total milk yield over  $[t_0; t_3]$  for Wood and PLM models, and on the estimated number of  
283 perturbation and percentage loss for PLM model, with a mixed analysis of variance model  
284 with goat as a random factor. Fixed effect of lactation stage (early *vs.* middle *vs.* late) was  
285 tested on RMSE and on PLM parameters  $t_p$ ,  $k_0$ ,  $k_1$ ,  $k_2$  with a mixed analysis of variance  
286 model with parity as a random factor. Pearson linear correlations were calculated for PLM  
287 parameters: intra-class of breed and parity for  $a$ ,  $b$ ,  $c$ ,  $N$ , and  $L$  and intra-class of stage of  
288 lactation for  $t_p$ ,  $k_0$ ,  $k_1$ , and  $k_2$ .

## 289 **RESULTS**

290 Lactation duration ranged from  $t_0 = 1.21 \pm 0.64$  to  $t_3 = 270.30 \pm 40.77$  days in milk. Early,  
291 middle and late lactation stages determined with Grossman's model were [1.21, 34.45],  
292 [34.45, 171.05] and [171.05, 270.30], respectively.

### 293 **Fitting**

294 The fitting procedure converged for the 319 lactations and detected a total of 2354  
295 perturbations with an average of 7.40 perturbations per lactation. Figure 3 shows the fitting of  
296 PLM on one lactation dataset. The fitting results on individual lactations exhibiting the  
297 minimum and maximum values for respectively the RMSE (0.11 kg and 0.41 kg) are provided  
298 in supplementary Figure 2. The number of perturbations varied between 4 and 11, the  
299 percentage loss between 2 % and 19 %, the total unperturbed milk yield was between 393.56  
300 kg and 1557 kg and the record interval length  $t_0 - t_3$  was between ([1, 5] to [165, 358] in  
301 days). During the first fitting steps, the Wood's parameters were stabilized on average after  
302 the detection of the first 4 perturbations (supplementary Figure 3). This indicates the  
303 robustness of the unperturbed curve.

304 Descriptive statistics of the results obtained from the fitting procedure of  $PLM_n$  are given in  
305 Table 1 by breed and parity and are compared to the results obtained with  $PLM_0$ ,  
306 corresponding to an adjustment of the Wood model without any perturbation. The value for  
307 the parameter  $a$  greatly increased between the Wood model and  $PLM_n$ . The values for  
308 parameters  $b$  and  $c$  decreased between the Wood model and  $PLM_n$ . As a consequence, values  
309 for peak milk and peak time increased between the Wood model and  $PLM_n$ . Both models did  
310 not give a similar level of variance of error according to breed or parity level. Regarding the  
311 quality of fitting, the RMSE values showed a fairly significant decline between the Wood  
312 model and  $PLM_n$  ( $0.17 \pm 0.08$  kg). Considering explicit perturbations in the fitting of the



313 Wood model with PLM compare to fitting directly the Wood function to data led to a  
314 decrease in RMSE, reflecting an improvement in the quality of the adjustment procedure.

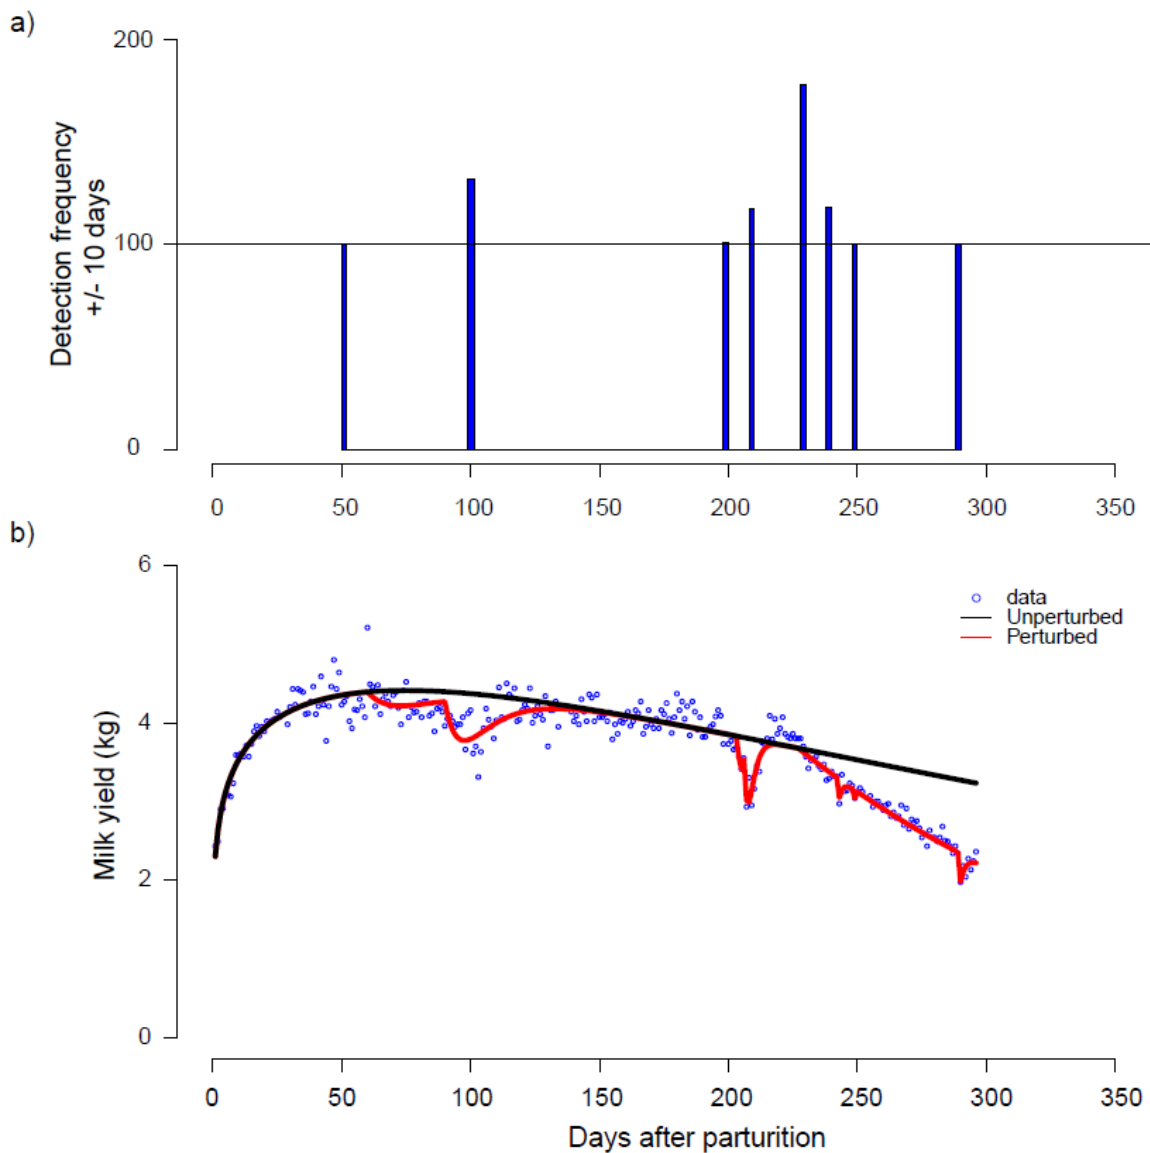

315

316 Figure3. Example of the perturbed lactation model fitting procedure result on a lactation  
317 dataset. a) frequency of detection of a single perturbation within  $\pm 10$  days; b: unperturbed  
318 and perturbed lactation models plotted against data.

319 Table 1. Results of the fitting procedure.

| model                            | All      |         |            |         | SAA (143) |         |           |         | ALP (176) |         |            |         | P-value |        |
|----------------------------------|----------|---------|------------|---------|-----------|---------|-----------|---------|-----------|---------|------------|---------|---------|--------|
|                                  | 1 (126*) |         | 2 + (193*) |         | 1 (59*)   |         | 2 + (84*) |         | 1 (67*)   |         | 2 + (109*) |         | Breed   | Parity |
| Wood <sup>1</sup>                | Mean     | sd      | Mean       | sd      | Mean      | sd      | Mean      | sd      | Mean      | sd      | Mean       | sd      |         |        |
| <i>a</i>                         | 1.884    | 0.626   | 2.385      | 0.793   | 1.840     | 0.551   | 2.443     | 0.844   | 1.922     | 0.686   | 2.339      | 0.761   | NS      | ***    |
| <i>b</i>                         | 0.217    | 0.111   | 0.242      | 0.114   | 0.215     | 0.109   | 0.226     | 0.107   | 0.218     | 0.114   | 0.254      | 0.118   | NS      | NS     |
| <i>c</i>                         | 0.004    | 0.002   | 0.004      | 0.002   | 0.003     | 0.002   | 0.004     | 0.002   | 0.003     | 0.001   | 0.005      | 0.002   | ***     | ***    |
| RMSE <sup>3</sup> (kg/d)         | 0.308    | 0.082   | 0.441      | 0.136   | 0.319     | 0.871   | 0.461     | 0.153   | 0.297     | 0.076   | 0.425      | 0.120   | *       | ***    |
| peak milk <sup>4</sup> (kg)      | 3.543    | 0.550   | 4.723      | 0.715   | 3.558     | 0.585   | 4.686     | 0.704   | 3.528     | 0.521   | 4.751      | 0.727   | NS      | ***    |
| peak time <sup>5</sup> (d)       | 63.850   | 32.180  | 56.809     | 22.007  | 74.280    | 39.884  | 60.232    | 24.758  | 54.658    | 19.504  | 54.170     | 19.334  | *       | *      |
| total milk (kg)                  | 719.601  | 149.136 | 972.838    | 204.343 | 731.910   | 150.040 | 986.850   | 223.174 | 708.762   | 148.614 | 962.039    | 188.906 | NS      | ***    |
| <b>PLM<sup>2</sup></b>           |          |         |            |         |           |         |           |         |           |         |            |         |         |        |
| <i>a</i>                         | 2.159    | 0.599   | 2.771      | 0.690   | 2.137     | 0.488   | 2.890     | 0.712   | 2.178     | 0.684   | 2.679      | 0.661   | NS      | ***    |
| <i>b</i>                         | 0.167    | 0.077   | 0.185      | 0.078   | 0.160     | 0.065   | 0.162     | 0.066   | 0.174     | 0.086   | 0.203      | 0.081   | ***     | NS     |
| <i>c</i>                         | 0.003    | 0.001   | 0.003      | 0.002   | 0.002     | 0.001   | 0.003     | 0.001   | 0.003     | 0.001   | 0.004      | 0.001   | ***     | ***    |
| RMSE <sup>3</sup> (kg/d)         | 0.184    | 0.040   | 0.245      | 0.051   | 0.193     | 0.050   | 0.246     | 0.042   | 0.176     | 0.026   | 0.244      | 0.057   | NS      | ***    |
| peak milk <sup>4</sup> (kg)      | 3.573    | 0.472   | 4.812      | 0.709   | 3.559     | 0.442   | 4.751     | 0.680   | 3.586     | 0.500   | 4.857      | 0.725   | *       | ***    |
| peak time <sup>5</sup> (d)       | 63.505   | 25.649  | 69.459     | 37.333  | 77.73     | 45.065  | 67.810    | 32.259  | 57.795    | 24.106  | 60.564     | 33.258  | ***     | NS     |
| S <sub>N</sub> <sup>6</sup> (kg) | 712.252  | 147.601 | 962.423    | 201.667 | 723.989   | 148.533 | 976.645   | 220.736 | 701.917   | 147.123 | 951.362    | 185.470 | NS      | ***    |
| S <sub>0</sub> <sup>7</sup> (kg) | 766.280  | 164.168 | 1053.915   | 232.294 | 780.748   | 165.600 | 1069.684  | 255.555 | 753.540   | 163.072 | 1041.654   | 212.872 | NS      | ***    |
| N                                | 7.587    | 1.304   | 7.380      | 1.471   | 7.525     | 1.278   | 7.440     | 1.508   | 7.642     | 1.333   | 7.333      | 1.447   | NS      | NS     |
| L (%)                            | 6.016    | 2.383   | 7.427      | 3.502   | 6.186     | 2.751   | 7.512     | 3.655   | 5.865     | 2.014   | 7.361      | 3.394   | NS      | ***    |

320 Signification codes: 0.001: '\*\*\*', 0.01: '\*\*', 0.05: '\*', NS : not significant.

321 ♦ Number of lactation curves

322 <sup>1</sup> Wood model (1967): *a*, *b*, and *c*: estimated Wood parameters, <sup>2</sup>Perturbated Lactation Model based on Wood, <sup>3</sup>RMSE: root mean square error of model fit, <sup>4</sup>peak  
323 milk= $a \cdot (\frac{b}{c})^b \cdot e^{-b}$ , <sup>5</sup>peak time =  $\frac{a}{b}$ , <sup>6</sup>total milk based on the PLM perturbed lactation curve:  $S_N = \sum_{t_0}^{t_1} y(t)$ , <sup>7</sup>total milk based on the PLM unperturbed lactation curve:  $S_0 =$   
324  $\sum_{t_0}^{t_1} y^*(t)$ , N: number of perturbation detected, L :rate of loss milk yield

325

## 326 **Unperturbed lactation curve**

327 Descriptive statistics of the parameters  $a$ ,  $b$  and  $c$  for the unperturbed lactation curves are  
328 presented in Table 1 for the overall dataset, breed and parity. The parameter  $a$ , which drives  
329 the general scaling of the curve, was not significantly different for the two breeds ( $2.52 \pm$   
330  $0.71$ ). Consequently, no significant breed effect was found for the peak milk or for the total  
331 unperturbed milk production. The same statistical effects were found with the Wood  
332 adjustment without perturbation. The parameter  $a$  was significantly affected by the parity of  
333 the lactation, with first lactations having a lower value for parameter  $a$  than the two and more  
334 parities. Consequently, there was a significant parity effect on the peak milk and on the total  
335 milk production. The parameter  $b$ , which drives the curvature of the lactation curve, was  
336 significantly affected by breed. Alpine goats exhibited higher values of  $b$  compared to Saanen  
337 goats (Alpine:  $0.19 \pm 0.08$ ; Saanen:  $0.16 \pm 0.06$ ). Parity also had a significant effect on the  
338 parameter  $b$ , with first lactations having a lower value for parameter  $b$  than two and more  
339 lactations. Regarding the parameter  $c$ , which drives the rate of decrease of milk production  
340 after the peak, both parity and breed effects were highly significant. Alpine goats exhibited a  
341 higher value for the parameter  $c$  than the Saanen goats (Alpine:  $0.003 \pm 0.001$ ; Saanen:  $0.002$   
342  $\pm 0.001$ ). For this parameter, first lactations had a lower value than two and more lactations  
343 (Primiparous:  $0.002 \pm 0.001$ ; Multiparous:  $0.003 \pm 0.001$ ). The peak time of the unperturbed  
344 curve, resulting from both  $b$  and  $c$  parameters, was significantly affected by breed, with  
345 Saanen goats exhibiting a peak 14 days later in lactation than the Alpine goats. The statistical  
346 effects found for  $PLM_n$  parameters were consistent with the effects found for the Wood model  
347 ( $PLM_0$ ), except for the peak time. Regarding peak time, the Wood model peak time was  
348 slightly affected by both breed and parity, while for the  $PLM_n$  peak time, breed had a very  
349 significant effect and parity was not significant.

350 Individual unperturbed lactation curves obtained with PLM<sub>n</sub> for increasing parities are shown  
351 in Figure 4. Some of these individual adjusted curves were considered as atypical, in the sense  
352 they were not similar to conventional definition of lactation curves. An individual lactation  
353 was considered “atypical” if the persistence estimated by PLM, *i.e.* the value of parameter *c*,  
354 was an outlier, defined as a value either 3 times above the inter-quartile range (IQR) (above  
355 the third quartile of the distribution for the *c* parameter) or 3 times below the IQR (below the  
356 first quartile of the distribution for the *c* parameter). A total of 18 curves were classified as  
357 atypical. Generally, these atypical curves come from the same goat in different parities or for  
358 primiparous that have not started the second parity. The peaks milk of the unperturbed  
359 lactation curve were increased by 27.47 % between the first parity and the second parity, by  
360 9.46 % between the second parity and the third parity and by -0.29 % between the third parity  
361 and the fourth parity (Figure 4). The total milk production for the unperturbed curve was  
362 increased by 32.55 % between the first parity and the second parity, 5.20 % between the  
363 second parity and the third parity and by 1.01 % between the third parity and the fourth parity.  
364 These results are consistent with Arnal et al. [23].

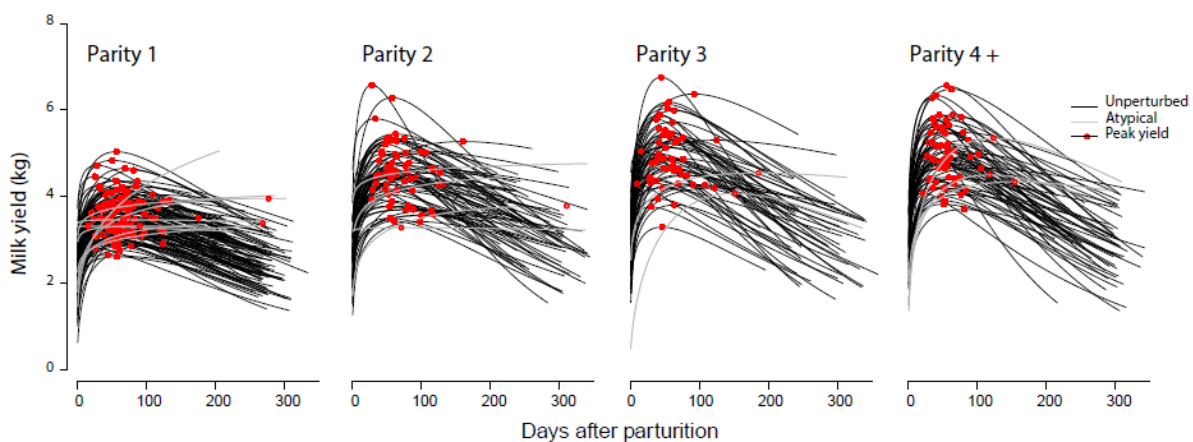

365

366 Figure 4: Individual unperturbed PLM-based lactation curves for increasing parity number (fit  
367 on 319 lactation data; atypical curves correspond to outlying estimates of the parameter *c*  
368 governing milk persistency).

369

370 The Pearson linear correlation matrix by breed and parity between the PLM-based  
 371 unperturbed parameters is shown in Figure 5 (panels a and b). A strong negative correlation  
 372 was found between  $a$  and  $b$  (-0.65), indicating that high values of  $a$  (scaling of the lactation  
 373 curve), were associated with low values of  $b$  (shaping the curve). A positive correlation was  
 374 found between the parameters  $c$  and  $b$  (0.64) indicating a positive association between the  
 375 shape of the curve and the rate of decrease of lactation. Finally, a low negative correlation  
 376 between  $c$  and  $a$  (-0.11) was found. These results are consistent with the well-known features  
 377 of lactation curves: higher milk at peak yield being associated with higher speed of decline  
 378 after peak [24].

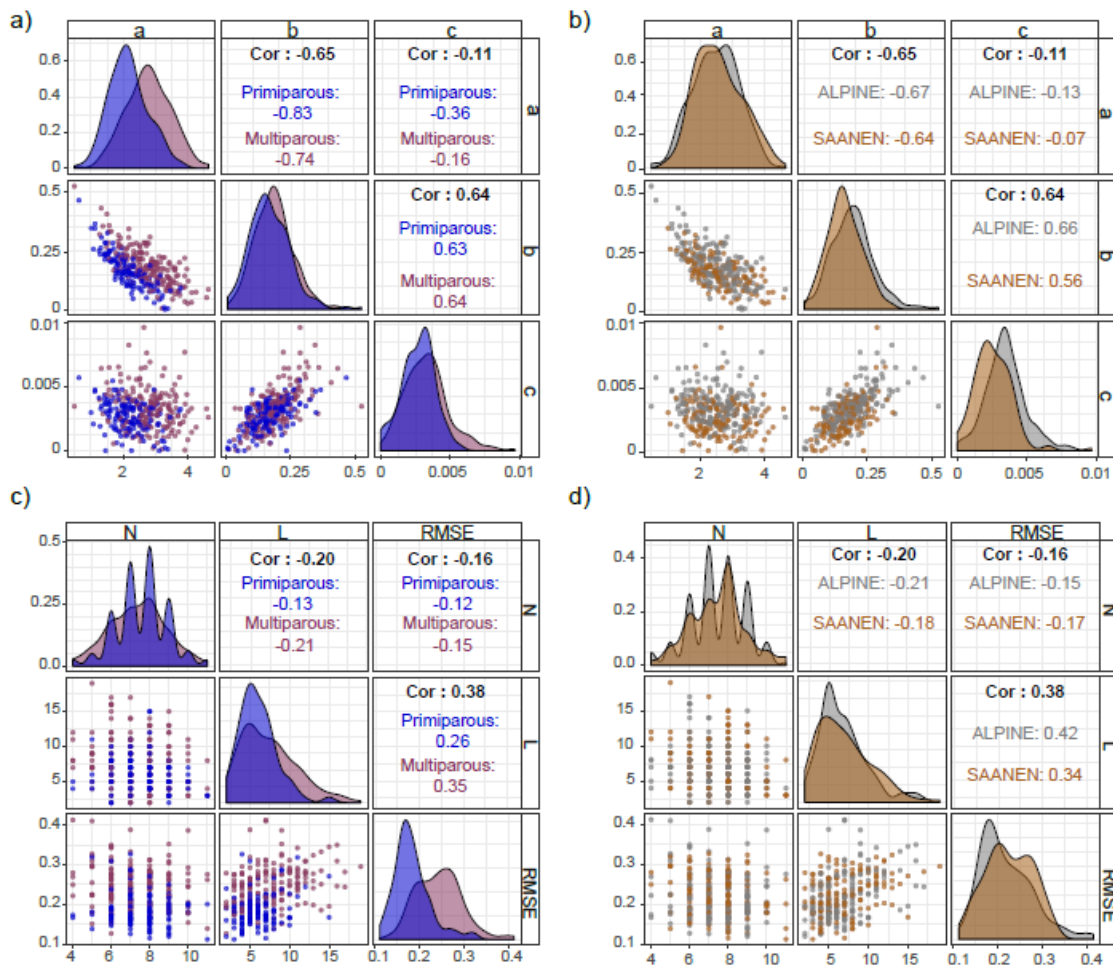

379

380 Figure 5. Pearson linear correlation matrix on the PLM-based parameters estimates: panels (a)  
 381 and (b): the  $a$ ,  $b$ ,  $c$  parameters defining the unperturbed curve (a: by parity and b: by breed).  
 382 (c) and (d) : the number of perturbations  $N$ , milk loss and RMSE (c: by parity and d: by  
 383 breed).

## 384 **Number of perturbations and milk loss**

385 The effects of parity and breed on the total number of perturbations were not significant (7.59  
386 for the primiparous 7.38 for the multiparous and 7.45 for the Alpine and 7.47 for the Saanen).  
387 By contrast, the rate of milk yield loss was significantly affected by the parity. A Pearson  
388 linear correlation matrix by breed and parity between PLM-based estimates of the number of  
389 perturbations ( $N$ ), percentage loss of milk yield ( $L$ ) and goodness of fit RMSE was also  
390 carried out (Figure 5, panels c and d). A positive correlation was noted between RMSE and  
391 milk loss (0.38). However, weak negative correlations between the number of detected  
392 perturbations and RMSE (-0.16), and the number of perturbations and the milk loss (-0.20)  
393 were also noted. Distributions of  $N$ ,  $L$  and RMSE showed an even larger difference according  
394 to the parity than to the breeds. These results show that it is not the number of perturbations  
395 that contribute the most to the loss in milk yield over the lactation.

## 396 **Perturbation timing and shape**

397 Table 2 gives descriptive statistics on the parameters of PLM characterizing the 2354  
398 perturbations detected during the fitting procedure: time  $t_p$ , intensity  $k_0$ , collapse speed  $k_1$  and  
399 recovery speed  $k_2$  according to the lactation stage determined with Grossman's model. Most of  
400 the perturbations were detected during the late stage of lactation ( $n = 1063$ ). The number of  
401 perturbations tended to decrease in middle stage ( $n = 1054$ ) and for early stage ( $n = 237$ ). The  
402 parameter  $k_0$  increased from early, middle and late lactation stage. These results suggest that  
403 throughout the lactation process, perturbations become more intense. The parameter  $k_1$   
404 decreased from early to late stages of lactation. This suggests that perturbations tended to be  
405 sharper at the beginning of lactation, with a high speed of collapse and recovery, while they  
406 tended to be more smooth as lactation progressed. Several factors (*e.g.*, breed, parity,  
407 seasonality and season of kidding) can affect characteristics of the lactation curve. The  
408 differences found in this study between primiparous and multiparous goats are consistent with

409 previous studies [23,24] with primiparous goats being less productive, with a lower peak yield  
 410 and a greater persistency. Despite the lack of a significant effect of parity, our results are  
 411 consistent with previous studies [24] where primiparous goats had a peak later than  
 412 multiparous (see Table 1). The strong breed effect we observed on peak time is consistent  
 413 with previous studies [24] with Saanen goats having a peak yield later than Alpine goats.

414 Table 2. Descriptive statistics of perturbation parameters for the 2354 perturbations detected  
 415 by the perturbed lactation model in the dairy goat lactation dataset.

| Perturbations  | Stage of lactation (2354) |        |              |        |             |        |
|----------------|---------------------------|--------|--------------|--------|-------------|--------|
|                | Early (237)               |        | Middle(1054) |        | Late (1063) |        |
|                | Mean                      | sd     | Mean         | sd     | Mean        | sd     |
| tp : time      | 33.767                    | 34.000 | 107.183      | 62.996 | 202.182     | 59.584 |
| k0 : intensity | 0.450                     | 0.331  | 0.506        | 0.349  | 0.672       | 0.359  |
| k1 : collapse  | 4.013                     | 4.170  | 3.407        | 3.870  | 2.760       | 3.694  |
| k2 : recovery  | 1.128                     | 1.961  | 1.181        | 1.794  | 0.954       | 1.714  |

416  
 417 The PLM parameter  $k_0$ , which drives the intensity of the perturbation, varied considerably  
 418 between 0.001 and 1 (set as a boundary). The parameter  $k_1$ , which drives the collapse speed of  
 419 the perturbation varied between 0 and 10. The parameter  $k_2$ , which drives the speed of  
 420 recovery, varied between 0 and 10. A gradient according to the stage lactation was noted for  
 421 these parameters with a gradual increase in  $k_0$  and a gradual decrease in  $k_1$  and  $k_2$  according  
 422 to early, middle and late lactation stages. In the late stage, 30.20 % of the perturbations were  
 423 detected with a parameter  $k_2$  equal to 0, which implied a perturbation without any recovery  
 424 period. Among these perturbations, 85.39 % had a  $k_0$  value equal to 1. On the other hand, in  
 425 the early and middle stages, the perturbations detected with an  $k_2$  equal to 0 were 1.70 % and  
 426 7.07 %, respectively.

427

428



## 429 **Discussion**

### 430 **1) Combining two types of models**

431 In this study, we described the PLM model, a tool for extracting simultaneously perturbed and  
432 unperturbed lactation curves from daily milk time-series. The key original feature of PLM is  
433 to combine an explicit representation of perturbations with a mathematical representation of  
434 the lactation curve.

435 Regarding the mathematical representation of the lactation curve, the structure of PLM is  
436 generic and any equation can be used to describe the general pattern of milk production  
437 throughout lactation (see appendix including Figure 4 showing illustrating results with other  
438 lactation models). The Wood model was chosen in this study as it is one of the most well-  
439 known and commonly used mathematical model of lactation curve. Behind the choice of  
440 considering a general pattern of lactation that is distorted by perturbations, the biological  
441 assumption is that the dairy female has a theoretical production potential (the unperturbed  
442 curve) corresponding to the expression of its genetics. This genetic potential may be not fully  
443 expressed in the farm environment because of perturbations (the perturbed curve).

444 Regarding the representation of perturbations, we chose an explicit formalism with a  
445 compartmental structure. Developing models that are able to capture perturbations in lactation  
446 curve is a longstanding issue in animal sciences. Historically, perturbations in milk production  
447 data were considered as impairing the quality of fitting of the mathematical equation of the  
448 lactation curve. Therefore, authors have developed approaches to take into account external  
449 factors that alter the lactation curve. Wood [25] himself was the first to modify his model in  
450 order to consider external factors affecting the shape of the lactation curve with a depressed  
451 production during the winter months (18-8 % in January) and an increased production in  
452 spring (14-7 % in May) regardless of the stage of lactation. With the same idea of altering the  
453 general model of the lactation curve to increase the goodness of fit, models were developed to



454 be more representative of the variability in the lactation curve. For example, Dhanoa [26]  
455 showed that by considering the time required to achieve maximum milk yield in the Wood  
456 model, the correlations between non-linear parameters were reduced. After this, Dhanoa and  
457 Le Du [27] introduced the autocorrelation notion between milk yield in a given stage of  
458 lactation and yield in the preceding stage. Another example is provided by Goodall and  
459 Sprevak [28] that, based on the Wood model, developed a stochastic model for milk yield to  
460 improve the fit of the lactation curve. The relationship between the maximum milk yield and  
461 Wood's parameter  $a$  is linear, but all three parameters affect maximum milk yield. Thus, any  
462 model attempting to explicitly represent alterations in milk yield and under-achievement  
463 relative to a theoretical potential should not be conceptually applied to parameter  $a$  but to the  
464 whole function.

465 With the development of on-farm data acquisition, allowing more frequent milk production  
466 measurements, and the development of more sophisticated statistical methods, modelling  
467 approaches have moved toward an explicit consideration of perturbations, instead of just  
468 eliminating them to improve the overall fitting of the lactation curve. Codrea et al. [13]  
469 studied the effect of nutritional challenge on the lactation curve using differential smoothing  
470 procedures for quantifying biological perturbations in animal performance. Results of this  
471 experience highlighted the decline in milk yield during the challenge period for each cow, and  
472 showed the presence of other deviations with unknown causes or unrelated to the "off-feed"  
473 experiment. Friggens et al. [4] used a clustering procedure linked to a piecewise mixed model  
474 to characterize different responses between lactation stages and types of response for the  
475 nutritional challenges. Other studies have highlighted the large differences in milk production  
476 in goats that are subject to the same dietary and environmental conditions [29]. There are few  
477 other approaches to describe the shape of the lactation curves from animals faced to health  
478 problems. Lescourret and Coulon [30] had shown the huge variability of milk production

479 response to mastitis in both form and intensity. Adriaens et al. [1] developed a novel  
480 methodology to predict quarter milk yield during clinical mastitis. The main shortcoming of  
481 these approaches is the lack of an explicit representation of perturbations which are only  
482 captured through statistical objects. To overcome this limit, models have been developed with  
483 a more explicit representation of perturbations. In the work of Revilla et al. [31] on growing  
484 piglets, a classical Gompertz equation, used to capture the unperturbed growth curve, is  
485 combined to an equation of the perturbation, used to capture the perturbation in body weight  
486 change induced by the weaning event. Sadoul et al. [32] used a model based on a spring and a  
487 damper to capture perturbations in physiological responses to challenges. This formalism  
488 allows to characterize perturbations with stiffness and resistance to the change of the system.  
489 The same concept has been applied to dry matter intake data [33]. These recent developments  
490 exhibit limits for capturing perturbations in the lactation curve. They were not extended to  
491 make it possible to capture multiple perturbations that may be imbricated. PLM overcomes  
492 these limitations as it allows the capture of multiple perturbations with contrasted features:  
493 from a sharp and short drop (for instance due to a diarrhoea episode) to a long and slow  
494 decrease (for instance due the gestation status). PLM also allows to determine the time at  
495 which the perturbations occur. This last point is of great interest to add value to on-farm data  
496 where challenge imposed to animals are not controlled and arise from the farm environment.  
497 Like all lactation models, the good functioning of PLM depends on several factors. The most  
498 important factor is the quality of datasets. If there is an inconsistency in the data, PLM loses  
499 its relevance.

500 By combining a general model of lactation curve with an explicit model of perturbations,  
501 PLM provides two key outputs: first, the unperturbed curve of the female which reflects its  
502 production potential in a non-perturbed environment and second the perturbed curve which  
503 reflects the production permitted by the farm environment. The PLM parameters ( $k_{0,i}$ ,

504  $k_{1,i}$  and  $k_{2,i}$ ) provides the most useful information on characteristics of the perturbed lactation  
505 curve including scale and shape for each perturbation. Indeed, by providing a perturbed curve,  
506 we give an estimate of the number of perturbations and for each perturbation an estimate of  
507 intensity ( $k_{0,i}$ , the collapse  $k_{1,i}$  and recovery  $k_{2,i}$  speed with a good capture of the time of the  
508 perturbation. This not only allows PLM to be flexible in capturing different types of  
509 perturbations (*e.g.* gestation, drying), but also to produce metrics to compare the effect of  
510 these perturbations on milk yield. In such cases, and by introducing the information  
511 concerning these perturbations as an explicit component in the Wood model, we force the  
512 model to take into account these perturbations to build the unperturbed curve.  
513 With the development of on-farm technology measurements, an interesting perspective for  
514 PLM is to be used on other biological time-series data (*e.g.* body weight, dry matter intake,  
515 hormones).

## 516 **2) Fitting algorithm**

517 Beyond the original concepts behind PLM, a key methodological development has been the  
518 fitting algorithm. The number of parameters to be determined is substantial, between on the  
519 one hand the Wood parameters of the unperturbed curve, and on the other the PLM  
520 parameters (time of perturbation and 3 parameters for each perturbation). To overcome the  
521 difficulty of estimating a high number of parameters, a 2-step algorithm was implemented.  
522 The first step of the procedure is to determine Wood parameters and the time when the  
523 perturbation starts. The second step of the procedure is to determine PLM parameters.  
524 Another difficulty in PLM development has been the choice of a maximum number of  
525 perturbations. After several attempts, this 2-step algorithm was selected for three main  
526 reasons. The first one was related to the visual quality of the fitting results itself. Indeed, the  
527 obtained fitted curve is always very close to what the human hand would have drawn after  
528 simply looking at the raw data and wondering what could be the curve without perturbations.

529 This proximity to what the human eye could have inferred was considered decisive, although  
530 subjective. The second reason was related to the issue of finding the number of perturbations.  
531 The procedure allows an automated determination of an optimal number of perturbations,  
532 without *a priori* or use of an arbitrarily chosen stopping criterion. Preliminary results have  
533 shown that allowing a maximal number of 15 perturbations to be detected in the first step of  
534 the algorithm was enough for the considered dataset. The third reason pertained to the model  
535 identifiability issue [17]. Since the fitting is based on a huge number of repeated fittings from  
536 which the systematically detected times of perturbations are retained, the 2-step fitting  
537 algorithm facilitates the practical identifiability of the model parameters. Indeed, the overall  
538 fitting algorithm was applied several times to the same dataset. That the parameter estimates  
539 were the same between the different runs strengthen the convergence properties of the  
540 algorithm.

541 Fitting results (see Figure 6) have shown that, in some cases, parameter estimates  
542 characterizing an individual perturbation reached their initial upper boundaries (1 for  
543 parameter  $k_{0,i}$  and 10 for parameters  $k_{1,i}$  and  $k_{2,i}$ ). This situation concerns perturbations with  
544 a narrow and deep peak-shape. By construction, as a percentage, the value of the parameter  
545  $k_0$  is not supposed to exceed 1. For the parameters  $k_1$  and  $k_2$ , a value of 10 already represents  
546 a very abrupt collapse or recovery, respectively. These results are therefore considered  
547 relevant. However, a next step may be to test the model on a larger dataset to assess the need  
548 to broaden these boundaries. Furthermore, another working step will consist in developing an  
549 application where the settings of the PLM algorithm can be user-defined (for instance, the  
550 maximal number of detectable perturbations or the size of the search grid in step one,  
551 boundaries of parameters, etc)

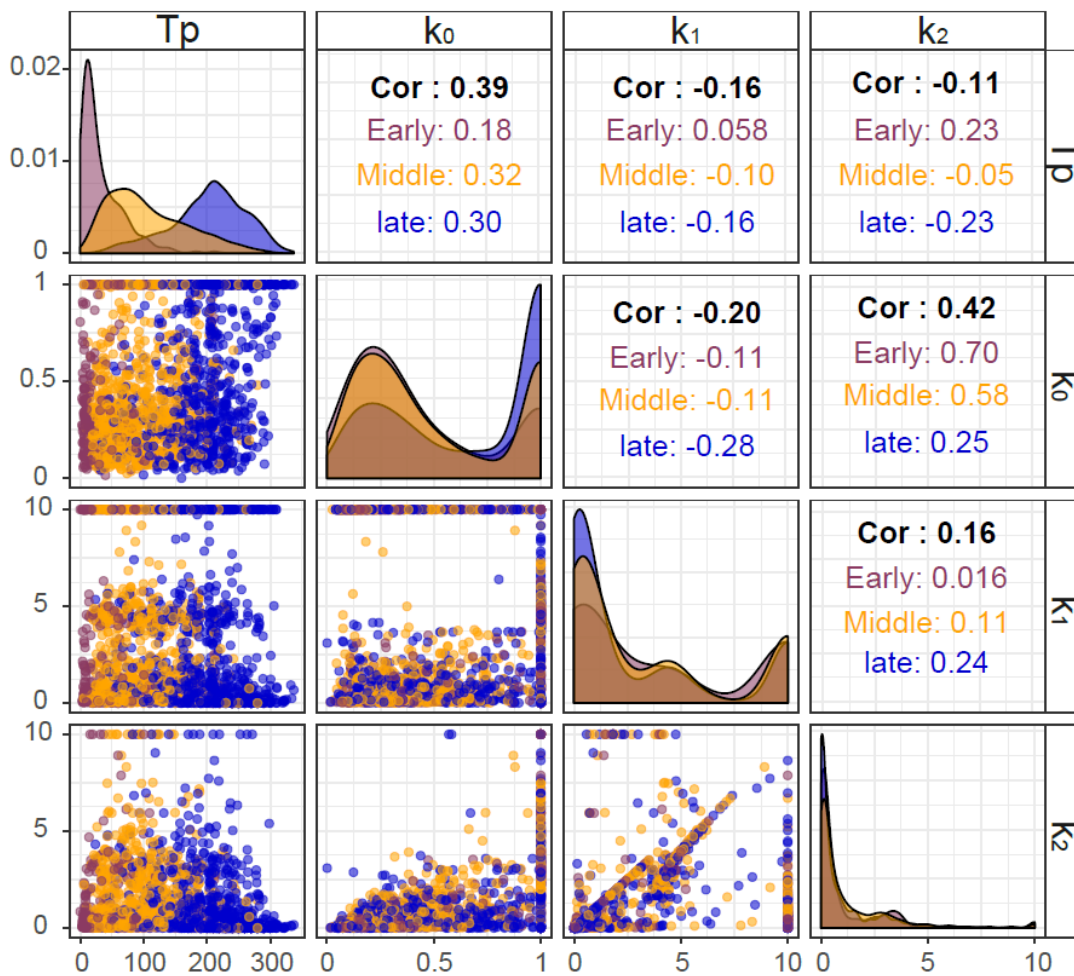

552

553 Figure 6: Pearson linear correlation matrix on the PLM parameters by stage of lactation: ( $t_p$  :  
554 perturbations times detected;  $k_0$  : intensity,  $k_1$  : collapse and  $k_2$  : recovery of perturbation.)

### 555 3) Phenotyping tool

556 PLM has been developed to improve our ability to phenotype animals by extracting biological  
557 meaningful information from raw data. The unperturbed curve fitted by PLM makes it  
558 possible to compare animals based on their potential of production. With this information,  
559 animals can be ranked based on the production level they would have achieved in a non-  
560 perturbed environment, instead of being ranked based on the measured production level. This  
561 ranking may be of interest for the farmer's breeding strategy, avoiding to cull animals that  
562 have faced a challenge and decreased their production while still having high genetic merit.

563 The perturbed curve and the characteristics of each perturbation (time, intensity, collapse and  
564 recovery) open the perspective of working on perturbations as such and using this information

565 for breeding and management. As a phenotyping tool, PLM can be useful for genetic  
566 selection. Studying characteristics of perturbations throughout many lactations of a large  
567 number of individuals and linking them to genetic or genomic information opens perspectives  
568 to evaluate their heritability and their potential genetic basis. PLM can also be a valuable tool  
569 for on-farm management. Linking perturbations with other information on the animals (such  
570 as lactation stage, parity, gestation stage...) can help to detect sensitive periods where  
571 perturbations are more likely to occur. By cross-checking information on perturbations from  
572 all animals with information on the farm environment (for instance temperature, diet quality),  
573 it would be possible to detect synchronous occurrences of perturbations and link them to farm  
574 environment. With this better understanding of environmental effects on animal production,  
575 preventive measures at farm scale could be undertaken.

576 Understanding the effects of the environment on farm animals and how they cope with  
577 perturbations is crucial to gain insights on resilience and robustness. These complex dynamic  
578 properties are highly desirable to face the changes occurring in the livestock sector [34].  
579 While the conceptual framework to work on resilience and robustness is now well defined in  
580 animal sciences, we still need operational metrics [35]. Such metrics have been proposed for a  
581 single perturbation (*e.g.*, Revilla et al., [31]; Sadoul et al. [32]). To our knowledge, existing  
582 metrics for the lactation curve, as proposed by Elgersma et al. [36], are based on a variance  
583 approach applied to the whole curve. Fluctuations in milk yield are summarized with a single  
584 statistical measure. Complementary to this type of approach, PLM can decompose the whole  
585 curve and characterize each perturbation, with metrics that are consistent with the concept of  
586 resilience (intensity, collapse, recovery). It offers a way of quantifying the consequences of  
587 external factors and exploring hypotheses about the biological types of response. By giving a  
588 biological meaning to these parameters, we reconcile a phenotyping tool with the opportunity  
589 of an explanatory approach.

## 590 **Conclusion**

591 By combining a general description of the lactation curve with an explicit representation of  
592 perturbations, the PLM model allows the characterization of the potential milk production,  
593 reflecting animal genetics, and the deviations induced by the environment, reflecting how  
594 animals cope with real farm conditions. The translation of raw time series data into  
595 quantitative indicators makes it possible to compare animals and bring insights on their  
596 resilience to external factors. In that sense, PLM is a valuable phenotyping tool and it  
597 contributes to provide decision solutions for dairy production that are grounded in a  
598 biologically meaningful framework. Further modelling studies should strive for integrating  
599 high throughput data analysis with such biological framework.

600

## 601 **Acknowledgments**

602 We gratefully acknowledge the team at the INRA UMR 791 Modélisation Systémique  
603 Appliquée aux Ruminants (Paris, France) experimental installation for the care of the animals  
604 and their work to provide robust performances data. Special thanks to Dr. R. Muñoz-Tamayo  
605 for their conscientious reading and meticulous corrections of the manuscript. This work was  
606 carried out with the financial support of the “ANR- Agence Nationale de la Recherche – The  
607 French National Research Agency’ under the “Deffilait project” (ANR; project: ANR-15-  
608 CE20-0014).

609

## 610 **References**

- 611 1. Adriaens I, Huybrechts T, Aernouts B, Geerinckx K, Piepers S, De Ketelaere B, et al.  
612 Method for short-term prediction of milk yield at the quarter level to improve udder  
613 health monitoring. *Journal of Dairy Science*. 2018;101: 10327–10336.  
614 doi:10.3168/jds.2018-14696
- 615 2. Huxley JN. Impact of lameness and claw lesions in cows on health and production.  
616 *Livestock Science*. 2013;156: 64–70. doi:10.1016/j.livsci.2013.06.012



- 617 3. West JW. Effects of Heat-Stress on Production in Dairy Cattle. *Journal of Dairy Science*.  
618 2003;86: 2131–2144. doi:10.3168/jds.S0022-0302(03)73803-X
- 619 4. Friggens NC, Duvaux-Ponter C, Etienne MP, Mary-Huard T, Schmidely P.  
620 Characterizing individual differences in animal responses to a nutritional challenge:  
621 Toward improved robustness measures. *Journal of Dairy Science*. 2016;99: 2704–2718.  
622 doi:10.3168/jds.2015-10162
- 623 5. Pond CM. The significance of lactation in the evolution of mammals. *Evolution*. 1977;31:  
624 177–199. doi:10.1111/j.1558-5646.1977.tb00995.x
- 625 6. Coulon JB, Pérochon L, Lescourret F. Modelling the effect of the stage of pregnancy on  
626 dairy cows' milk yield. *Animal Science*. 1995;60: 401–408.  
627 doi:10.1017/S1357729800013278
- 628 7. Dijkstra J, France J, Dhanoa MS, Maas JA, Hanigan MD, Rook AJ, et al. A Model to  
629 Describe Growth Patterns of the Mammary Gland During Pregnancy and Lactation.  
630 *Journal of Dairy Science*. 1997;80: 2340–2354. doi:10.3168/jds.S0022-0302(97)76185-X
- 631 8. Grossman M, Koops WJ. Modeling Extended Lactation Curves of Dairy Cattle: A  
632 Biological Basis for the Multiphasic Approach1. *Journal of dairy science*. 2003;86: 988–  
633 998. doi:10.3168/jds.S0022-0302(03)73682-0
- 634 9. Delage J, Leroy AM, Poly J. Une étude sur les courbes de lactation. *Annales de*  
635 *zootechnie*. 1953. pp. 225–267.
- 636 10. Wood P. Algebraic model of the lactation curve in cattle. *Nature*. 1967;216: 164.
- 637 11. Erb HN, Smith RD, Oltenacu PA, Guard CL, Hillman RB, Powers PA, et al. Path Model  
638 of Reproductive Disorders and Performance, Milk Fever, Mastitis, Milk Yield, and  
639 Culling in Holstein Cows. *Journal of Dairy Science*. 1985;68: 3337–3349.  
640 doi:10.3168/jds.S0022-0302(85)81244-3
- 641 12. Huybrechts T, Mertens K, De Baerdemaeker J, De Ketelaere B, Saeys W. Early warnings  
642 from automatic milk yield monitoring with online synergistic control. *Journal of Dairy*  
643 *Science*. 2014;97: 3371–3381. doi:10.3168/jds.2013-6913
- 644 13. Codrea MC, Højsgaard S, Friggens NC. Differential smoothing of time-series  
645 measurements to identify disturbances in performance and quantify animal response  
646 characteristics: An example using milk yield profiles in dairy cows1. *Journal of Animal*  
647 *Science*. 2011;89: 3089–3098. doi:10.2527/jas.2010-3753
- 648 14. Casado C, Piquer O, Cervera C, Pascual JJ. Modelling the lactation curve of rabbit does:  
649 Towards a model including fit suitability and biological interpretation. *Livestock Science*.  
650 2006;99: 39–49. doi:10.1016/j.livprodsci.2005.05.019
- 651 15. Ruiz R, Oregui LM, Herrero M. Comparison of Models for Describing the Lactation  
652 Curve of Latxa Sheep and an Analysis of Factors Affecting Milk Yield. *Journal of Dairy*  
653 *Science*. 2000;83: 2709–2719. doi:10.3168/jds.S0022-0302(00)75165-4
- 654 16. France J, Thornley JH. *Mathematical models in agriculture*. Butterworths. 1984.



- 655 17. Muñoz-Tamayo R, Puillet L, Daniel JB, Sauvant D, Martin O, Taghipoor M, et al.  
656 Review: To be or not to be an identifiable model. Is this a relevant question in animal  
657 science modelling? *animal*. 2018;12: 701–712. doi:10.1017/S1751731117002774
- 658 18. Bellu G, Saccomani MP, Audoly S, D'Angiò L. DAISY: A new software tool to test  
659 global identifiability of biological and physiological systems. *Computer Methods and*  
660 *Programs in Biomedicine*. 2007;88: 52–61. doi:10.1016/j.cmpb.2007.07.002
- 661 19. Padfield D, Matheson G. nls. multstart: robust non-linear regression using AIC scores. R  
662 package version. 2018;1.
- 663 20. Akaike H. A new look at the statistical model identification, *IEEE T. Automat. Contr.*, 19,  
664 716–723. 1974;
- 665 21. Grossman M, Hartz SM, Koops WJ. Persistency of Lactation Yield: A Novel Approach.  
666 *Journal of Dairy Science*. 1999;82: 2192–2197. doi:10.3168/jds.S0022-0302(99)75464-0
- 667 22. Martin O, Sauvant D. Metaanalysis of Input/Output Kinetics in Lactating Dairy Cows.  
668 *Journal of Dairy Science*. 2002;85: 3363–3381. doi:10.3168/jds.S0022-0302(02)74424-X
- 669 23. Arnal M, Robert-Granié C, Larroque H. Diversity of dairy goat lactation curves in France.  
670 *Journal of Dairy Science*. 2018;101: 11040–11051. doi:10.3168/jds.2018-14980
- 671 24. Gipson T, Grossman M. Lactation curves in dairy goats: a review. *Small Ruminant*  
672 *Research*. 1990;3: 383–396. doi:10.1016/0921-4488(90)90019-3
- 673 25. Wood PDP. Factors affecting the shape of the lactation curve in cattle. *Animal*  
674 *Production*. 1969;11: 307–316. doi:10.1017/S0003356100026945
- 675 26. Dhanoa MS. A note on an alternative form of the lactation model of Wood. *Animal*  
676 *Production*. 1981;32: 349–351. doi:10.1017/S0003356100027276
- 677 27. Dhanoa MS, Du YLPL. A partial adjustment model to describe the lactation curve of a  
678 dairy cow. *Animal Production*. 1982;34: 243–247. doi:10.1017/S0003356100010175
- 679 28. Goodall EA, Sprevak D. A Bayesian estimation of the lactation curve of a dairy cow.  
680 *Animal Production*. 1985;40: 189–193. doi:10.1017/S0003356100025290
- 681 29. Gaddour A, Najari S, Ouni M. Dairy performances of the goat genetic groups in the  
682 southern Tunisian. *Agricultural Journal*. 2007;2: 248–253. doi:aj.2007.248.253
- 683 30. Lescourret F, Coulon JB. Modeling the Impact of Mastitis on Milk Production by Dairy  
684 Cows. *Journal of Dairy Science*. 1994;77: 2289–2301. doi:10.3168/jds.S0022-  
685 0302(94)77172-1
- 686 31. Revilla M, Friggens NC, Broudicou LP, Lemonnier G, Blanc F, Ravon L, et al. Towards  
687 the quantitative characterisation of piglets' robustness to weaning: a modelling approach.  
688 *animal*. 2019; 1–11. doi:10.1017/S1751731119000843
- 689 32. Sadoul B, Martin O, Prunet P, Friggens NC. On the Use of a Simple Physical System  
690 Analogy to Study Robustness Features in Animal Sciences. Pant AB, editor. *PLOS ONE*.  
691 2015;10: e0137333. doi:10.1371/journal.pone.0137333

- 692 33. Nguyen Ba H, Van Milgen J, Taghipoor M. A procedure to quantify the feed intake  
693 response of growing pigs to perturbations. *Animal*. 2019;
- 694 34. Dumont B, González-García E, Thomas M, Fortun-Lamothe L, Ducrot C, Dourmad JY, et  
695 al. Forty research issues for the redesign of animal production systems in the 21st century.  
696 *Animal*. 2014;8: 1382–1393. doi:10.1017/S1751731114001281
- 697 35. Friggens NC, Blanc F, Berry DP, Puillet L. Review: Deciphering animal robustness. A  
698 synthesis to facilitate its use in livestock breeding and management. *animal*. 2017;11:  
699 2237–2251. doi:10.1017/S175173111700088X
- 700 36. Elgersma GG, de Jong G, van der Linde R, Mulder HA. Fluctuations in milk yield are  
701 heritable and can be used as a resilience indicator to breed healthy cows. *Journal of Dairy*  
702 *Science*. 2018;101: 1240–1250. doi:10.3168/jds.2017-13270
- 703
