1 **Lactation curve model with explicit representation of perturbations as a phenotyping tool**  
2 **for dairy livestock precision farming**

3

4 Ben Abdelkrim Ahmed<sup>1,2</sup>, Puillet Laurence<sup>1</sup>, Gomes Pierre<sup>1,3</sup>, Martin Olivier<sup>1</sup>

5 <sup>1</sup> UMR MoSAR, INRA, AgroParisTech, Université Paris-Saclay, 75005, Paris, France

6 <sup>2</sup> GABI, INRA, AgroParisTech, Université Paris-Saclay, 78350, Jouy-en-Josas, France

7 <sup>3</sup> NEOVIA, 56250, Saint-Nolff, France

8 **About the Authors**

9

10 Ahmed Ben Abdelkrim: Conceptualization, Methodology, Visualization, Software  
11 implementation, Writing – Original draft preparation

12 Laurence Puillet: Conceptualization, Data curation, Writing – review & editing

13 Pierre Gomes: Conceptualization, Methodology, Preliminary tests

14 Olivier Martin: Conceptualization, Supervision, Writing – review & editing

15 **Data Availability:**

16 All relevant data are within the paper and its Supporting Information files. The R code for the  
17 Perturbed Lactation Model is available under request for academic purposes.

18 **Funding:**

19 This work was funded by the “Deffilait project” (ANR; project: ANR-15-CE20-0014).

20 **Competing Interests:**

21 The authors have declared that no competing interests exist.

22 **Keywords:**

23 Dairy Goats, Milk Yield, Individual Variability, Resilience, Perturbations

24 **Abstract**

25 **Background**

26 Understanding the effects of environment on livestock provides valuable information on how  
27 farm animals express their production potential, and on their welfare. Ruminants often face  
28 perturbations that affect their performance. Evaluating the effect of these perturbations on  
29 animal performance could provide metrics to quantify how animals cope with their environment  
30 and therefore, better manage them. In dairy systems, milk production records can be used to  
31 evaluate perturbations because (1) they are easily accessible, (2) the overall dynamics  
32 throughout the lactation process have been widely described, and (3) perturbations often occur  
33 and cause milk loss. In this study, a lactation curve model with explicit representation of  
34 perturbations was developed.

35 **Methods**

36 The perturbed lactation model is made of two components. The first one describes a theoretical  
37 unperturbed lactation curve (unperturbed lactation model), and the second describes deviations  
38 from the unperturbed lactation model. The model was fitted on 319 complete lactation data  
39 from 181 individual dairy goats allowing for the characterization of individual perturbations in  
40 terms of their starting date, intensity, and shape.

41 **Results**

42 The fitting procedure detected a total of 2,354 perturbations with an average of 7.40  
43 perturbations per lactation. Loss of production due to perturbations varied between 2% and  
44 19%. Results show that the number of perturbations is not the major factor explaining the loss  
45 in milk yield over the lactation, suggesting that there are different types of animal response to  
46 challenging factors.

47 **Conclusions**

48 By incorporating explicit representation of perturbations, the model allowed the  
49 characterization of potential milk production, deviations induced by perturbations (loss of  
50 milk), and thereby comparison between animals. These indicators are likely to be useful to  
51 move from raw data to decision support tools in dairy production.

## 52 INTRODUCTION

53 In the context of precision livestock farming, simple interpretive tools are required to convert  
54 raw time series datasets, now routinely recorded in animals, into useful information for on-farm  
55 decision-making. Such tools are not only expected to provide farmers with good information  
56 on performance level of individual animals, but also to detect pathological, nutritional or  
57 environmental problems affecting production traits at individual or herd scales. In dairy  
58 systems, it is well known that milk yield can be affected by events such as udder health  
59 problems [1], lameness [2], meteorological changes [3], or feed quality [4]. Such problems  
60 induce perturbations in the course of the lactation process and result in a serrated shape pattern  
61 of the lactation curve. These perturbations can be seen as deviations of the lactation curve from  
62 its typical profile. This typical profile reflects that lactation is a physiological process common  
63 to mammalian females, and as a result, its expression through time follows a general pattern  
64 [5]. It can be described in 3 phases. The first phase starts after parturition with the initial milk  
65 yield increasing to a maximum or peak yield. The second phase is a plateau-like period in which  
66 maximum milk yield is maintained for a more or less long time. The third phase is the decrease  
67 from the peak yield. This last phase can be divided into two parts according to the speed of  
68 decrease, the first one corresponding to an approximately constant declining rate of milk  
69 production after the peak yield, and the second corresponding to an acceleration of the milk  
70 yield decline as pregnancy progresses before the start of the dry period when lactation stops [6–  
71 8]. Modelling the lactation curve is a long standing issue [9] and numerous authors have  
72 proposed mathematical models allowing the characterization of milk yield dynamics, *i.e.*, the  
73 transformation of a series of temporal data into a vector of estimated parameters via a fitting  
74 procedure. The most famous and used model is the one published by Wood in 1967 [10]. The  
75 overall objective of lactation models is to reduce the variability in data by creating a profile,  
76 thereby being able to characterize an average animal milk production, or to compare the

77 production of different animals. This strategy of using lactation models as phenotyping tool has  
78 been very useful in the past years (for instance, test-day models for genetic selection) and in a  
79 context of scarce raw data. An important limitation of these modelling approaches is that short-  
80 term perturbations are removed during the fitting procedure in order to extract an unperturbed  
81 phenotype, corresponding to a typical lactation curve. However, characterizing perturbations  
82 can be highly relevant for better understanding the resilience of dairy females regarding their  
83 milk production and therefore for making management decisions [11]. Furthermore, evaluating  
84 the effect of perturbations on animal performance could provide metrics to quantify how  
85 animals cope with their environment, and develop management strategies to find a good balance  
86 between animal welfare and performance.

87 The need for incorporating perturbations into lactation curve models is also driven by the  
88 development of precision livestock farming. Now, we have more frequent and reliable data and  
89 we can transition data analysis from reducing variability around average profiles to extracting  
90 variability to provide information. High throughput data has led to the development and use of  
91 statistical methods, such as smoothing methods, to capture and understand perturbations [12].  
92 Codrea et al. [12] studied the effect of nutritional challenges on the lactation curve in dairy  
93 cows using differential smoothing procedures for quantifying biological perturbations in an  
94 animal performance. Results of this study highlighted the decline in milk yield during the  
95 challenge period for each cow, and showed the presence of other deviations with unknown  
96 causes or unrelated to the feed restriction during experiment. On the other hand, Friggens et al.  
97 [4] used a clustering procedure linked to a piecewise mixed model to characterize different  
98 responses between lactation stages and types of response for the nutritional challenges. Another  
99 study have highlighted the large differences in milk production in goats that are subject to the  
100 same diet and environmental conditions [13]. There are few other approaches to describe the  
101 shape of the lactation curves from animals faced with health problems. Lescourret and Coulon

102 [14] had shown the huge variability of milk production in response to mastitis in both form of  
103 the lactation curve and intensity of milk production. Adriaens et al. [1] developed a novel  
104 methodology to predict quarter milk yield during clinical mastitis.

105 The main shortcoming of approaches cited above is the lack of an explicit representation of  
106 perturbations which are only captured through statistical objects. To overcome this limit,  
107 models on different animal species have been developed with a more explicit representation of  
108 perturbations. In the work of Revilla et al. [15] on growing piglets, a classical Gompertz  
109 equation, used to capture the unperturbed growth curve, is combined to an equation of the  
110 perturbation, used to capture the perturbation in body weight change induced by the weaning  
111 stress. Another model based on differential equations was developed to characterize the feed  
112 intake response of growing pigs to perturbations [16]. Sadoul et al. [17] used a model based on  
113 a spring and a damper to capture perturbations in physiological responses to challenges on  
114 rainbow trout. This formalism allows the characterization of perturbations with stiffness and  
115 resistance to the change of the system.

116 These recent modelling developments exhibit two major limits for application to lactation  
117 curve: first, they do not allow to capture multiple perturbations that may be imbricated and  
118 second they imply that the time of perturbation is *a priori* known.

119 In this study, we developed a Perturbed Lactation Model (PLM) that incorporates an explicit  
120 representation of perturbations and that converts individual raw time-series data into biological  
121 meaningful parameters. The fitting procedure of PLM allows the detection and the  
122 characterization of perturbations in milk time-series. The objective of the present paper is (1)  
123 to introduce the PLM model and the explicit representation of perturbations, (2) to describe the  
124 use of PLM to detect and characterize perturbations in milk yield time series with an example  
125 in dairy goats, and (3) to illustrate the role of PLM as a phenotyping tool by analyzing the

126 variability in perturbed lactation curves on the basis of the fitting results obtained on the dairy  
127 goat dataset.

## 128 MATERIALS AND METHODS

129 The PLM is composed of a lactation model, denoted  $Y^*$ , describing the theoretical unperturbed  
130 dynamics of milk yield along the lactation, and a perturbation model, denoted  $\pi$ , describing  
131 deviations from the lactation model. The list of model parameters is provided in Table 1.

132 Table 1: Model parameters

| Symbol                                                                                  | Definition                                                                           |
|-----------------------------------------------------------------------------------------|--------------------------------------------------------------------------------------|
| <i>Wood Model</i>                                                                       |                                                                                      |
| $a$                                                                                     | Parameter scaling the general level of the lactation curve                           |
| $b$                                                                                     | Parameter controlling the type and magnitude of the curvature of the lactation curve |
| $c$                                                                                     | Parameter regulating the rate of decrease in milk yield after the lactation peak     |
| <i>Perturbed Lactation Model with <math>N</math> perturbations (<math>PLM_N</math>)</i> |                                                                                      |
| $N$                                                                                     | Number of perturbations                                                              |
| $i$                                                                                     | Perturbation number ( $i \in [0; N]$ )                                               |
| $t_{P,i}$                                                                               | Time of start of the $i^{th}$ perturbation                                           |
| $k_{0,i}$                                                                               | Parameter of intensity of the $i^{th}$ perturbation                                  |
| $k_{1,i}$                                                                               | Parameter of collapse speed of the $i^{th}$ perturbation                             |
| $k_{2,i}$                                                                               | Parameter of recovery speed of the $i^{th}$ perturbation                             |

133 The dynamics of daily milk yield ( $Y(t)$ , in kg) during the lactation is thus given by:

134 
$$Y(t) = Y^*(t) \cdot \pi(t)$$

135 where  $t$  is the time after parturition in days.

### 136 Unperturbed lactation model

137 Among the numerous mathematical models developed to study lactation curves, the incomplete  
138 Gamma function proposed by Wood [10] has been widely used in different mammals (*e.g.*,  
139 rabbit [18], sheep [19], cattle [20]). This model gives a general expression for the dynamics of  
140 milk yield along the lactation. In this article, we have selected this model as an example to  
141 define the unperturbed lactation curve. Because the structure of PLM is generic, any other  
142 lactation model can be used.

143 The Wood model is given by:

144 
$$Y^*(t) = a \cdot t^b \cdot e^{-c \cdot t}$$



145 where  $Y^*(t)$  is the unperturbed daily milk yield in kg,  $t$  is the time in days after parturition  
146 and  $a$ ,  $b$ ,  $c$  are positive parameters that determine the shape of the lactation curve ( $a$  scales the  
147 general level of the curve,  $b$  controls the type and magnitude of the curvature of the function,  
148 and  $c$  regulates the rate of decrease in milk yield after the lactation peak). Values of these  
149 parameters can be used to calculate some essential features of the lactation curve such as the  
150 time of peak yield ( $b/c$ , in days), the lactation persistency, *i.e.*, the extent to which peak yield  
151 is maintained ( $-(b + 1) \cdot \ln(c)$  in  $\text{kg}\cdot\text{d}^{-1}$ ), or the peak yield ( $a \cdot (b/c)^b \cdot e^{-b}$  in kg) [21].

## 152 **Perturbation model**

153 The perturbation model is based on the idea that each single perturbation  $i$  affecting lactation  
154 dynamics can be described as a transient proportional decrease in milk yield, through a  
155 sequence of collapse and recovery. Each perturbation can thus be modelled by way of a 3-  
156 compartment model (Figure 1) representing the dynamics of the proportion of milk withdrawn  
157 from the theoretical unperturbed yield.

158 The three compartments of the model are:  $A_i$ , the maximal proportion potentially affected by  
159 the  $i^{\text{th}}$  perturbation,  $U_i$ , the proportion unaffected by the  $i^{\text{th}}$  perturbation, and  $P_i$ , the proportion  
160 effectively affected by the  $i^{\text{th}}$  perturbation. Given the structure of the compartmental model,  
161 forming a path from  $A_i$  to  $U_i$  through  $P_i$ , and given that the model is defined such as  $A_i + P_i +$   
162  $U_i = 1$ , the dynamics of  $P_i$  represents the proportional deviation in milk yield.

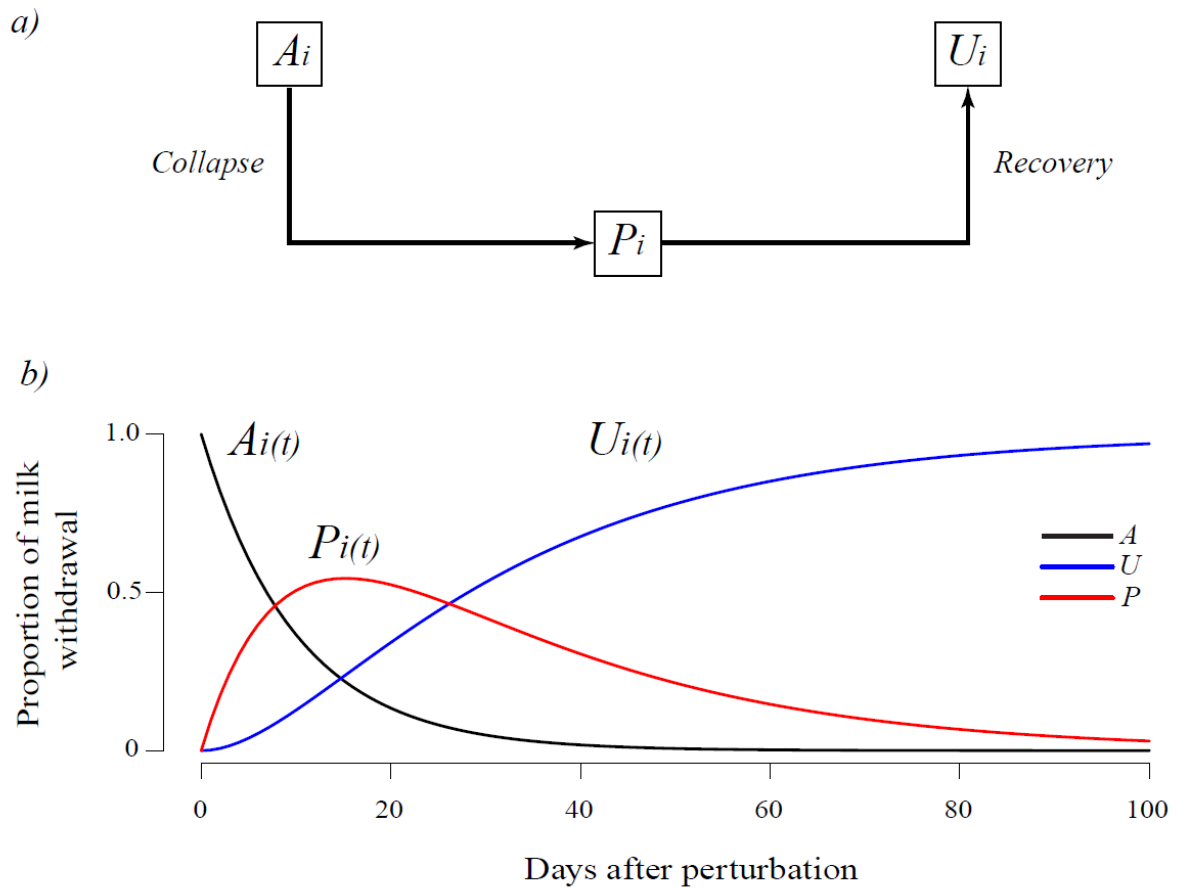

163

164 Figure 1. Conceptual model of a single perturbation.  $A$ : proportion affected by the perturbation,  
 165  $P$ : proportion effectively affected by the perturbation,  $U$ : proportion unaffected by the  
 166 perturbation. a) Model diagram and b) Solution dynamics.

167 The perturbation model for a single perturbation  $i$  is defined by the following simple differential  
 168 system:

169

$$if\ t \geq t_p: \begin{cases} \frac{dA_i}{dt} = -k_{1,i} \cdot A_i \\ \frac{dP_i}{dt} = +k_{1,i} \cdot A_i - k_{2,i} \cdot P_i \\ \frac{dU_i}{dt} = +k_{2,i} \cdot P_i \end{cases} \quad otherwise: \begin{cases} \frac{dA_i}{dt} = 0 \\ \frac{dP_i}{dt} = 0 \\ \frac{dU_i}{dt} = 0 \end{cases}$$

170

171 with the following initial conditions at parturition time ( $t = 0$ ):

172

$$\begin{cases} A_i(0) = k_{0,i} \\ P_i(0) = 0 \\ U_i(0) = 1 - k_{0,i} \end{cases}$$

173 and where  $t_{P_i}$ , is the time of start of the  $i^{th}$  perturbation,  $k_{0,i}$  is the parameter of intensity of the  
 174  $i^{th}$  perturbation ( $k_{0,i} \in ]0; 1]$ ),  $k_{1,i}$  is the parameter of collapse speed of the  $i^{th}$  perturbation and  
 175  $k_{2,i}$  is the parameter of recovery speed of the  $i^{th}$  perturbation.

176 Assuming that  $k_{1,i} \neq k_{2,i}$ , the algebraic solution of this differential system is given by:

$$177 \quad \begin{cases} A_i(t) = k_{0,i} \cdot e^{-k_{1,i} \cdot \Delta_i(t)} \\ P_i(t) = \frac{k_{0,i} \cdot k_{1,i}}{k_{1,i} - k_{2,i}} \cdot (e^{-k_{2,i} \cdot \Delta_i(t)} - e^{-k_{1,i} \cdot \Delta_i(t)}) \\ U_i(t) = 1 - \frac{k_{0,i}}{k_{1,i} - k_{2,i}} \cdot (k_{1,i} \cdot e^{-k_{2,i} \cdot \Delta_i(t)} - k_{2,i} \cdot e^{-k_{1,i} \cdot \Delta_i(t)}) \end{cases}$$

178 where  $\Delta_i(t)$  is the elapsed time since the beginning of the  $i^{th}$  perturbation and is given by:

$$179 \quad \Delta_i(t) = \begin{cases} 0 & \text{if } t < t_{P_i} \\ t - t_{P_i} & \text{if } t \geq t_{P_i} \end{cases}$$

180 Finally, the perturbation model, including  $n$  individual perturbations affecting the lactation  
 181 curve is given by:

$$182 \quad \pi(t) = \prod_{i=1}^n (1 - P_i(t))$$

183

## 184 **Model formalism**

185 The detailed algebraic formula of PLM with  $n$  individual perturbations is given by:

$$186 \quad Y(t) = a \cdot t^b \cdot e^{-c \cdot t} \cdot \prod_{i=1}^n \left( 1 - \frac{k_{0,i} \cdot k_{1,i}}{k_{1,i} - k_{2,i}} \cdot (e^{-k_{2,i} \cdot \Delta_i(t)} - e^{-k_{1,i} \cdot \Delta_i(t)}) \right)$$

187 The model includes the three parameters of the Wood model ( $a$ ,  $b$ , and  $c$ ) to define the  
 188 unperturbed lactation curve, one parameter to define the number of perturbations affecting the  
 189 lactation curve ( $n$ ), and four parameters per individual perturbation  $i$  ( $t_{P_i}$ ,  $k_{0,i}$ ,  $k_{1,i}$ , and  $k_{2,i}$ ) so  
 190 that the total number of parameters to define PLM is equal to  $4 + 4 \cdot n$ .

191 A simulation of PLM with five perturbations over 300 days of lactation is shown in Figure 2 as  
 192 an illustration of the model behavior.

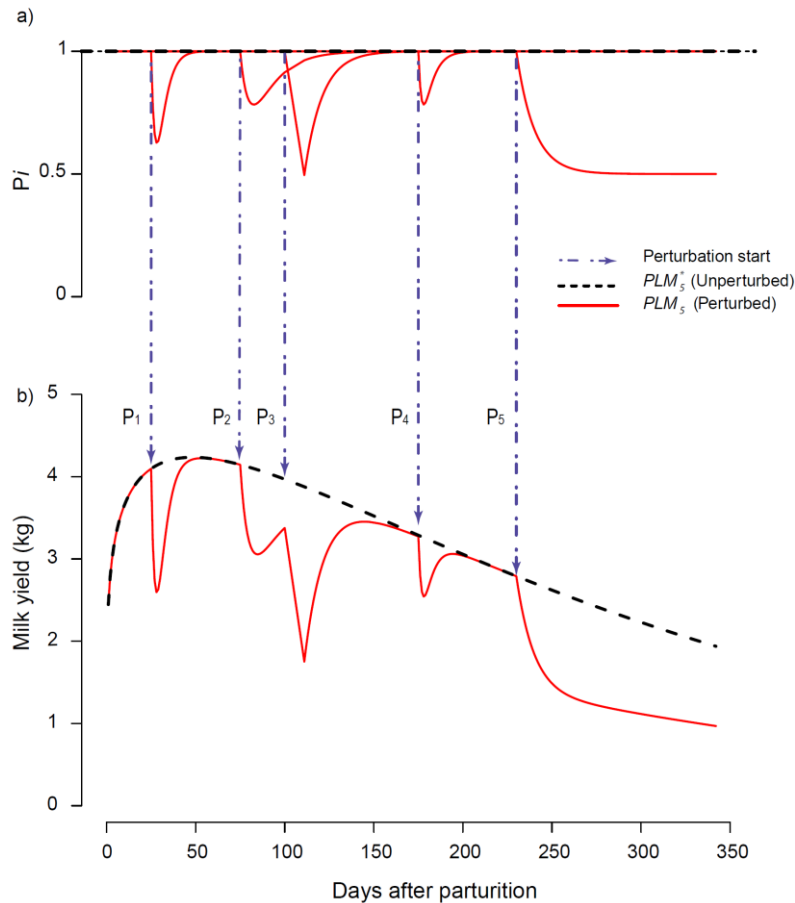

193

194 Figure 2. Example of a simulation of the Perturbed Lactation Model (PLM) including five  
195 perturbations with a) individual perturbations dynamics expressed as the proportion of  
196 unperturbed lactation curve ( $P_i$ ) and b) unperturbed and perturbed milk yield dynamics.

197 Perturbations were considered individually so that a perturbation can occur within another one  
198 (see  $P_3$  in Figure 2 at  $t_{P_3} = 100$ ). Given that individual perturbations are proportional  
199 deviations multiplied between them, when a perturbation is added during another perturbation,  
200 the new perturbation is a proportion of the already perturbed curve. Moreover, perturbations  
201 can be used to simulate the effect of pregnancy (see  $P_5$  in Figure 2 at  $t_{P_5} = 225$ ) with the  
202 recovery parameter  $k_{2,i}$  set to zero.

### 203 **Fitting procedure**

204 PLM is aimed at detecting perturbations in milk yield time-series data and thus, provide  
205 estimates of (1) a theoretical unperturbed lactation curve and (2) the number, timing and shape  
206 of the perturbations leading to the observed perturbed lactation curve. A dedicated algorithm

207 was developed in R (R Core Development Team, 2018) with the aim of fitting PLM on lactation  
208 data and deriving parameter estimates  $a, b$ , and  $c$  to characterize the unperturbed lactation  
209 curve,  $n$  to define the number of perturbations and parameter estimates ( $t_{P_i}, k_{0,i}, k_{1,i}$ , and  $k_{2,i}$ )  
210 for each  $i^{th}$  detected perturbation. Preliminary tests have shown that repeated fittings using  
211 different starting values can lead to the detection of perturbations differing in total number and  
212 detection order. This raised the question of the theoretical identifiability of the model  
213 parameters (for further details on identifiability see [22]) and of the use of a stop criterion to  
214 estimate  $n$ . The structure of the model does not allow a classical identifiability analysis to be  
215 performed if  $n$  is unknown. However, by using the software DAISY (Differential Algebra for  
216 Identifiability of Systems [23]), we could assess that for one perturbation the PLM parameters  
217 are locally identifiable. To facilitate the identification of the model parameters, we adopted a  
218 fitting strategy in two steps: first, performing numerous repeated fittings to estimate the most  
219 frequent number of perturbations. In the second step, we fixed as known the number of  
220 perturbations detected in step 1 and proceeded to estimate the remaining parameters of the  
221 model. This strategy ultimately makes it possible to estimate an optimal number of  
222 perturbations and facilitates the estimation of the model parameters.

223 In the following section,  $PLM_n$  stands for PLM with  $n$  perturbations,  $k_{W_n}$  stands for the triplet  
224 of parameters  $(a, b, c)$  of Wood's model estimated with  $n$  perturbations ( $n$  ranging from 0 to  
225  $n_{max}$ ) and  $k_{P_{i,n}}$  stands for the quadruplet  $(t_{P_i}, k_{0,i}, k_{1,i}, k_{2,i})$  of the  $i^{th}$  perturbation ( $n$  ranging  
226 from 1 to  $n_{max}$ ). Since  $PLM_n$  combines an estimated unperturbed lactation curve and  $n$   
227 perturbations,  $PLM_n^*$  stands for the unperturbed lactation model (*i.e.*, the lactation curve when  
228 the  $n$  perturbations are removed).  $PLM_0$  (*i.e.*, PLM with zero perturbation) corresponds to the  
229 original Wood's model without any perturbation.

230 The `nls.multstart` package (version 1.0.0; [24]) performing non-linear least squares regression  
231 with the Levenberg-Marquardt algorithm and with multiple starting values was used for each

232 single fit. Two different sampling schemes of starting parameters were used: random sampling  
233 of starting parameters from a uniform distribution within the starting parameter bounds or  
234 selection of combinations of starting parameters at equally spaced intervals across each of the  
235 starting parameter bounds. These two fitting methods are hereafter referred to as ‘shotgun  
236 search’ and ‘gridstart search’ respectively. Starting parameter bounds are defined as follows:  
237  $a$ : [0; 100];  $b$ : [0; 1];  $c$ : [0; 1];  $t_{P_i}$ : [ $t_0$ ;  $t_3$ ] (where  $t_0$  and  $t_3$  are the times of first and last records  
238 of the dataset);  $k_{0,i}$ : [0; 1];  $k_{1,i}$ : [0; 10];  $k_{2,i}$ : [0; 10]. For the ‘shotgun search’, the number of  
239 random combinations of starting parameters was set to 100,000. For the ‘gridstart search’, the  
240 number of combinations of starting parameters (*i.e.*, the size of the grid), was set to five for  
241 parameters  $a$ ,  $b$ ,  $c$ ,  $k_{0,i}$ ,  $k_{1,i}$ ,  $k_{2,i}$  and to 10 for the parameter  $t_{P_i}$ . Consequently, for the fit of  
242 one perturbation (*i.e.*, estimating  $3 + 4 = 7$  parameters) the number of tested combinations of  
243 starting parameters was  $7^6 \times 10 = 1,176,490$ . For both search methods, the best model was  
244 selected on the basis of the lowest Akaike Information Criterion (AIC) score [25].

245 The whole fitting procedure includes repetitions of a fitting sequence that proceeds by  
246 successive addition of perturbations. This fitting sequence is defined in such a way that the  
247 estimate of the parameters of each new perturbation is obtained while the parameters of the  
248 previously added perturbations are kept fixed. Therefore, the fitting of PLM<sub>*i*</sub> provides  
249 parameters estimates for the new added  $i^{\text{th}}$  perturbation and for a new version of Wood model’s  
250 parameters  $k_{W_i}$  (*i.e.*, each time a new perturbation is added, a new version of the unperturbed  
251 lactation is refined). For a given lactation dataset composed of daily milk yield records, the  
252 preliminary fitting of PLM<sub>0</sub> (*i.e.*, the original Wood’s model without any perturbation) was first  
253 performed to estimate  $k_{W_0}$ . Then, the fitting sequence starts by the fitting of PLM<sub>1</sub> (*i.e.*, PLM  
254 with 1 perturbation) thus providing estimates  $k_{W_1}$  and  $k_{P_{1,1}}$ . Then, the fitting of PLM<sub>2</sub> consists  
255 in estimating  $k_{W_2}$  and  $k_{P_{2,2}}$  with  $k_{P_{1,2}}$  fixed equal to  $k_{P_{1,1}}$ . Then, the fitting of PLM<sub>3</sub> consists  
256 in estimating  $k_{W_3}$  and  $k_{P_{3,3}}$  with  $k_{P_{1,3}}$  and  $k_{P_{2,3}}$  fixed equal to  $k_{P_{1,2}}$  and  $k_{P_{2,2}}$ , respectively.

257 The procedure is applied stepwise until the maximum number of perturbation  $n_{max}$  is reached.  
258 This maximum number is an *a priori* user defined value to fix a stop criterion. Preliminary tests  
259 have shown that setting  $n_{max} = 15$  was sufficient. The end of the fitting sequence consists in  
260 reordering the  $n_{max}$  detected perturbations in decreasing order according to the time of  
261 perturbation  $t_{P_i}$  (the original obtained order of perturbations is based on the opportunities found  
262 by the fitting procedure to improve the goodness-of-fit for each added perturbation).  
263 Finally, the whole fitting procedure is carried out following the 3 following steps:  
264 Step1: Repeat 100 times the fitting sequence with the ‘shotgun search’ and  $n_{max} = 15$ .  
265 Step2: Compare the fitting results of the 100 repetitions obtained in Step1 and identify  
266 perturbations systematically detected at  $t_{P_i} \pm 3$  days. This was performed by counting, for the  
267 15 perturbations over the 100 fitting results, the number of occurrences of the rounded value  
268  $t_{P_i}^* = \text{round}(t_{P_i}/7) \cdot 7$ . Step1 provides the optimal number of perturbations denoted  $N$  (*i.e.*,  
269 the value of  $n$  giving the best fit) with an estimate of  $t_{P_i}$  for each perturbation (calculated as the  
270 median of the  $t_{P_i}$  with the same rounded value  $t_{P_i}^*$ ).  
271 Step3: Perform the fitting sequence with the ‘gridstart search’, with  $n_{max} = N$  and with starting  
272 parameters bounds for each  $t_{P_i}$  reset to  $[t_{P_i} - 10 ; t_{P_i} + 10]$ . This last fit provides the final  
273 estimates  $k_{WN}$  and  $(k_{P_{1,N}}, \dots, \text{and } k_{P_{N,N}})$  characterizing respectively the best fit for the  
274 unperturbed model and the  $N$  detected perturbations. The Root Mean Square Error (RMSE)  
275 was calculated to indicate the goodness-of-fit of  $PLM_N$ . Additionally, the percentage of loss ‘ $L$ ’  
276 was calculated using the formula  $L = 1 - S_N^*/S_N$  where  $S_N^*$  and  $S_N$  are respectively the total  
277 milk yield over  $[t_0; t_3]$  calculated with  $PLM_N^*$  (the unperturbed curve corrected from  $N$   
278 perturbations) and  $PLM_N$  (the perturbed curve with  $N$  perturbations).  
279 To provide complementary information on lactation time-series and refine PLM outputs  
280 analysis, the model of Grossman et al. [26] was also fit to lactation data as described in Martin

281 and Sauvant [27]. This fitting cuts the lactation period into three stages corresponding to early,  
282 middle and late stages (respectively intervals  $[t_0; t_1]$ : increasing phase,  $[t_1; t_2]$ : plateau-like  
283 phase, and  $[t_2; t_3]$ : decreasing phase). This triphasic model, based on a smoothing logistic  
284 transition between intersecting straight lines, specifies the cut points of the three stages (instead  
285 of *a priori* number of days in milk). This fit was performed using the ‘gridstart search’ with  
286  $[t_0; t_3]$  as starting parameters bounds for the interval terminals  $t_1$  and  $t_2$ .

### 287 **Dairy goat dataset**

288 In this study we used data from 181 goats (94 Alpine and 87 Saanen) born between 2009 and  
289 2017. Data concerned 319 lactations (126 primiparous and 193 multiparous; parity ranging  
290 from 1 to 7) including 80,773 milk records from the dairy goat herd of the INRA-AgroParisTech  
291 Systemic Modelling Applied to Ruminants research unit (Paris, France) between 2015 and  
292 2018. Records are shown in supplementary Figure 1 by breed and parity. All lactations  
293 considered had at least one record in the first 5 days of lactation and a last record between 150  
294 and 358 days of lactation (no extended lactation included).

### 295 **Statistical analysis**

296 All statistical analyses were performed using R (R Core Development Team, 2018).  
297 Fixed effects of breed (Saanen *vs.* Alpine) and parity (1 *vs.* 2 and more) were tested on  
298 parameters of Wood, with and without the changes made from PLM model. It was also tested  
299 on estimated peak milk yield, peak time, total milk yield over  $[t_0; t_3]$ , the number of perturbation  
300 and the rate milk loss using a mixed analysis of variance model with goat as a random factor.  
301 Fixed effect of lactation stage (early *vs.* middle *vs.* late) was tested on RMSE and on PLM  
302 parameters  $t_p, k_0, k_1, k_2$  with a mixed analysis of variance model with parity as a random factor.  
303 Pearson linear correlations were calculated for PLM parameters: intra-class of breed and parity  
304 for  $a, b, c, N$ , and  $L$  and intra-class of stage of lactation for  $t_p, k_0, k_1$ , and  $k_2$ .



305 **RESULTS**

306 Lactation duration ranged from  $t_0 = 1.2 \pm 0.6$  to  $t_3 = 270.3 \pm 40.8$  days in milk. Early, middle,  
307 and late lactation stages determined with Grossman's model were 1.2 to 34.4, 34.4 to 171.0,  
308 and 171.0 to 270.3 days, respectively.

309 **Fitting**

310 The fitting procedure converged for the 319 lactations and detected a total of 2,354  
311 perturbations with an average of 7.4 perturbations per animal per lactation. Figure 3 shows the  
312 fitting of PLM on one lactation dataset. The fitting results on individual lactations exhibiting  
313 the minimum and maximum values for the RMSE (0.1 kg and 0.4 kg) are provided in  
314 supplementary Figure 2. The number of perturbations varied between 4 and 11, the percentage  
315 of milk loss between 2% and 19%, the total unperturbed milk yield was between 393 kg and  
316 1,557 kg and the record interval length was between 1 and 5 days for  $t_0$  and between 165 and  
317 358 days for  $t_3$ . During the first fitting steps, the Wood's parameters were stabilized on average  
318 after the detection of the first 4 perturbations (supplementary Figure 3). This indicates the  
319 robustness of the unperturbed curve.

320 Descriptive statistics of the results obtained from the fitting procedure of PLM<sub>N</sub> are given in  
321 Table 2 by breed and parity and are compared to the results obtained with PLM<sub>0</sub>, corresponding  
322 to an adjustment of the Wood model without any perturbations. The value for the parameter  $a$   
323 greatly increased between the Wood model and PLM<sub>N</sub>. The values for parameters  $b$  and  $c$   
324 decreased between the Wood model and PLM<sub>N</sub>. As a consequence, values for peak milk and  
325 time of peak increased between the Wood model and PLM<sub>N</sub>. Both models did not give a similar  
326 level of variance of error according to breed or parity level. Regarding the quality of fitting, the  
327 RMSE values showed a fairly significant decline between the Wood model ( $0.4 \pm 0.1$  kg) and  
328 PLM<sub>N</sub> ( $0.2 \pm 0.1$  kg). Considering explicit perturbations in the fitting of the Wood model with

329 PLM compare to fitting directly the Wood function to data led to a decrease in RMSE, reflecting  
330 an improvement in the goodness of fit.

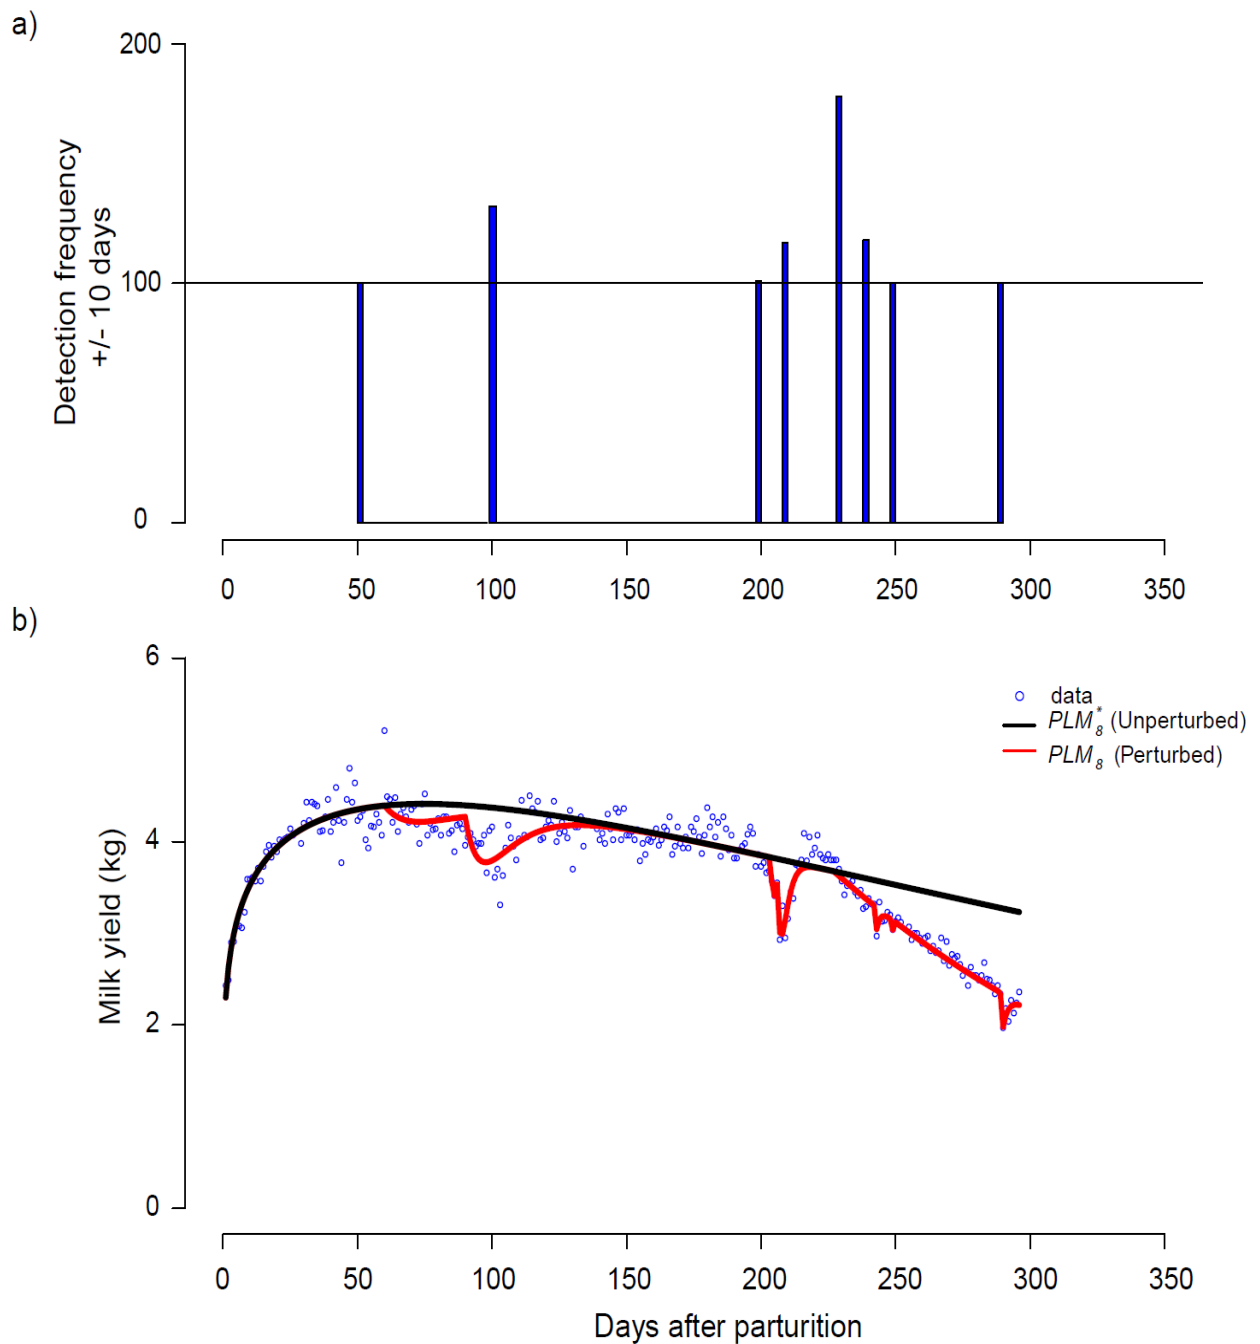

331

332 Figure3. Example of the perturbed lactation model fitting procedure result on a one goat  
333 lactation dataset. a) frequency of detection of a single perturbation within +/- 10 days; b:  
334 unperturbed and perturbed lactation models plotted against data.

335 Table 2. Results of the fitting procedure: comparison between breeds and lactation numbers across the models and variables.

| model                                 | All      |        |            |        |              |        | SAA (143) |        |           |        |              |        | ALP (176) |        |            |        |              |        | P-value |        |
|---------------------------------------|----------|--------|------------|--------|--------------|--------|-----------|--------|-----------|--------|--------------|--------|-----------|--------|------------|--------|--------------|--------|---------|--------|
|                                       | 1 (126*) |        | 2 + (193*) |        | total (319*) |        | 1 (59*)   |        | 2 + (84*) |        | total (143*) |        | 1 (67*)   |        | 2 + (109*) |        | total (176*) |        |         |        |
|                                       | Mean     | sd     | Mean       | sd     | Mean         | sd     | Mean      | sd     | Mean      | sd     | Mean         | sd     | Mean      | sd     | Mean       | sd     | Mean         | sd     | Breed   | Parity |
| <b>Wood<sup>1</sup></b>               |          |        |            |        |              |        |           |        |           |        |              |        |           |        |            |        |              |        |         |        |
| <i>a</i>                              | 1.88     | 0.63   | 2.39       | 0.79   | 2.14         | 0.71   | 1.84      | 0.55   | 2.44      | 0.84   | 2.20         | 0.83   | 1.92      | 0.69   | 2.34       | 0.76   | 2.17         | 0.72   | NS      | ***    |
| <i>b</i>                              | 0.22     | 0.11   | 0.24       | 0.11   | 0.23         | 0.11   | 0.22      | 0.11   | 0.23      | 0.11   | 0.23         | 0.11   | 0.22      | 0.11   | 0.25       | 0.12   | 0.24         | 0.12   | NS      | NS     |
| <i>c</i>                              | 0.004    | 0.002  | 0.004      | 0.002  | 0.004        | 0.002  | 0.003     | 0.002  | 0.004     | 0.002  | 0.004        | 0.002  | 0.003     | 0.001  | 0.005      | 0.002  | 0.004        | 0.02   | ***     | ***    |
| <b>RMSE<sup>3</sup> (kg/d)</b>        | 0.31     | 0.08   | 0.44       | 0.14   | 0.38         | 0.11   | 0.32      | 0.87   | 0.46      | 0.15   | 0.40         | 0.15   | 0.30      | 0.08   | 0.43       | 0.12   | 0.38         | 0.13   | *       | ***    |
| <b>Peak milk<sup>4</sup> (kg)</b>     | 3.54     | 0.55   | 4.72       | 0.72   | 4.13         | 0.64   | 3.56      | 0.59   | 4.69      | 0.70   | 4.25         | 0.88   | 3.53      | 0.52   | 4.75       | 0.73   | 4.26         | 0.87   | NS      | ***    |
| <b>Peak time<sup>5</sup> (d)</b>      | 63.85    | 32.18  | 56.81      | 22.01  | 60.33        | 27.10  | 74.28     | 39.88  | 60.23     | 24.76  | 67.26        | 32.32  | 54.66     | 19.50  | 54.17      | 19.33  | 54.42        | 19.42  | *       | *      |
| <b>Total milk (kg)</b>                | 719.60   | 149.14 | 972.84     | 204.34 | 846.22       | 176.74 | 731.91    | 150.04 | 986.85    | 223.17 | 859.38       | 186.60 | 708.77    | 148.61 | 962.04     | 188.91 | 865.51       | 168.76 | NS      | ***    |
| <b>PLM<sup>2</sup></b>                |          |        |            |        |              |        |           |        |           |        |              |        |           |        |            |        |              |        |         |        |
| <i>a</i>                              | 2.16     | 0.60   | 2.77       | 0.69   | 2.53         | 0.72   | 2.14      | 0.49   | 2.89      | 0.71   | 2.58         | 0.73   | 2.18      | 0.68   | 2.68       | 0.66   | 2.49         | 0.71   | NS      | ***    |
| <i>b</i>                              | 0.17     | 0.08   | 0.19       | 0.08   | 0.18         | 0.08   | 0.16      | 0.07   | 0.16      | 0.07   | 0.16         | 0.07   | 0.17      | 0.09   | 0.20       | 0.08   | 0.19         | 0.08   | ***     | NS     |
| <i>c</i>                              | 0.003    | 0.001  | 0.003      | 0.002  | 0.003        | 0.001  | 0.002     | 0.001  | 0.003     | 0.001  | 0.003        | 0.001  | 0.003     | 0.001  | 0.004      | 0.001  | 0.003        | 0.001  | ***     | ***    |
| <b>RMSE<sup>3</sup> (kg/d)</b>        | 0.18     | 0.04   | 0.25       | 0.05   | 0.22         | 0.05   | 0.19      | 0.05   | 0.25      | 0.04   | 0.22         | 0.05   | 0.18      | 0.03   | 0.24       | 0.06   | 0.21         | 0.06   | NS      | ***    |
| <b>Peak milk<sup>4</sup> (kg)</b>     | 3.57     | 0.47   | 4.81       | 0.71   | 4.19         | 0.59   | 3.56      | 0.44   | 4.75      | 0.68   | 4.28         | 0.83   | 3.59      | 0.50   | 4.86       | 0.73   | 4.37         | 0.90   | *       | ***    |
| <b>Peak time<sup>5</sup> (d)</b>      | 63.51    | 25.65  | 69.46      | 37.33  | 66.49        | 31.49  | 77.73     | 45.07  | 67.81     | 32.26  | 68.89        | 29.72  | 57.80     | 24.11  | 60.56      | 33.26  | 59.50        | 30.04  | ***     | NS     |
| <b>S<sub>N</sub><sup>6</sup> (kg)</b> | 712.25   | 147.60 | 962.42     | 201.67 | 837.34       | 174.64 | 723.99    | 148.53 | 976.65    | 220.74 | 850.32       | 184.64 | 701.92    | 147.12 | 951.36     | 185.47 | 826.64       | 166.30 | NS      | ***    |
| <b>S<sub>N</sub><sup>7</sup> (kg)</b> | 766.28   | 164.17 | 1,053.92   | 232.29 | 910.10       | 198.23 | 780.75    | 165.60 | 1,069.68  | 255.55 | 925.21       | 210.58 | 753.54    | 163.07 | 1,041.65   | 212.87 | 897.60       | 187.97 | NS      | ***    |
| <b>N</b>                              | 7.59     | 1.30   | 7.38       | 1.47   | 7.49         | 1.39   | 7.53      | 1.28   | 7.44      | 1.51   | 7.48         | 1.41   | 7.64      | 1.33   | 7.33       | 1.45   | 7.45         | 1.41   | NS      | NS     |
| <b>L (%)</b>                          | 6.02     | 2.38   | 7.43       | 3.50   | 6.73         | 2.94   | 6.19      | 2.75   | 7.51      | 3.66   | 6.97         | 3.37   | 5.87      | 2.01   | 7.36       | 3.39   | 6.79         | 3.02   | NS      | ***    |

336 Signification codes: ≤0.001: '\*\*\*', 0.01: '\*\*', 0.05: '\*', NS : not significant.

337 ♦ Number of lactation curves

338 <sup>1</sup> Wood model (1967): *a*, *b*, and *c*: estimated Wood parameters, <sup>2</sup> Perturbated Lactation Model based on Wood, <sup>3</sup> RMSE: root mean square error of model fit, <sup>4</sup> peak milk

339 =  $a \cdot \left(\frac{b}{c}\right)^b \cdot e^{-b}$ , <sup>5</sup> peak time =  $\frac{a}{b}$ , <sup>6</sup> total milk based on the PLM perturbed lactation curve:  $S_N = \sum_{t_0}^{t_1} y(t)$ , <sup>7</sup> total milk based on the PLM unperturbed lactation curve:  $S_N^* =$

340  $\sum_{t_0}^{t_1} y^*(t)$ , N: number of perturbation detected, L: milk yield loss

341

## 342 **Unperturbed lactation curve**

343 Descriptive statistics of the parameters  $a$ ,  $b$  and  $c$  for the unperturbed lactation curves (for both  
344 models:  $PLM_N^*$  and Wood model) are presented in Table 2 for the overall dataset, breed and  
345 parity. The parameter  $a$ , which drives the general scaling of the curve, was not significantly  
346 different for the two breeds (Alpine:  $2.49 \pm 0.71$ ; Saanen:  $2.58 \pm 0.73$ ). Consequently, no  
347 significant breed effect was found for the peak milk or for the total unperturbed milk production.  
348 The same statistical effects were found with the Wood adjustment without perturbation. The  
349 parameter  $a$  was significantly affected by the parity of the lactation, with first lactations having  
350 a lower value for parameter  $a$  than the two and more parities (Table 2). Consequently, there  
351 was a significant parity effect on the peak milk and on the total milk production. The parameter  
352  $b$ , which drives the curvature of the lactation curve, was significantly affected by breed. Alpine  
353 goats exhibited higher values of  $b$  compared to Saanen goats (Alpine:  $0.19 \pm 0.08$ ; Saanen:  $0.16$   
354  $\pm 0.07$ ). Parity also had a significant effect on the parameter  $b$ , with first lactations having a  
355 lower value for parameter  $b$  than two and more lactations. Regarding the parameter  $c$ , which  
356 drives the rate of decrease of milk production after the peak, both parity and breed effects were  
357 highly significant. Alpine goats exhibited a same value for the parameter  $c$  than the Saanen  
358 goats (Alpine:  $0.003 \pm 0.001$ ; Saanen:  $0.003 \pm 0.001$ ). For this parameter, first lactations had a  
359 lower value than two and more lactations (Primiparous:  $0.002 \pm 0.001$ ; Multiparous:  $0.003 \pm$   
360  $0.001$ ). The peak time of the unperturbed curve, resulting from both  $b$  and  $c$  parameters, was  
361 significantly affected by breed, with Saanen goats exhibiting a peak 14 days later in lactation  
362 than the Alpine goats. The statistical effects found for  $PLM_N^*$  parameters were consistent with  
363 the effects found for the Wood model ( $PLM_0$ ), except for the peak time. Regarding peak time,  
364 the Wood model peak time was slightly affected by both breed and parity, while for the  $PLM_N^*$   
365 peak time, breed had a very significant effect and parity was not significant.

366 Individual unperturbed lactation curves obtained with  $PLM_N^*$  for increasing parities are shown  
367 in Figure 4. Some of these individual adjusted curves were considered as atypical, in the sense  
368 they departed from the general shape of the Wood model. An individual lactation was  
369 considered “atypical” if the persistence estimated by PLM, *i.e.* the value of parameter  $c$ , was an  
370 outlier, defined as a value either 3 times above the inter-quartile range (IQR) (above the third  
371 quartile of the distribution for the  $c$  parameter) or 3 times below the IQR (below the first quartile  
372 of the distribution for the  $c$  parameter). However, it is important to note that atypical curves  
373 observed in the dataset were biologically true. A total of 18 out of the 319 analyzed curves were  
374 classified as atypical. Generally, these atypical curves come from the same goat in different  
375 parities or for primiparous that have not started the second parity. Peaks of milk of the  
376 unperturbed lactation curve were on average increased by 27.47% between the first parity and  
377 the second parity, by 9.46% between the second parity and the third parity, and by -0.29%  
378 between the third parity and the fourth parity (Figure 4). The total milk production for the  
379 unperturbed curve was increased by 32.55% between the first parity and the second parity,  
380 5.20% between the second parity and the third parity, and by 1.01% between the third parity  
381 and the fourth parity. These results are consistent with Arnal et al. [28].

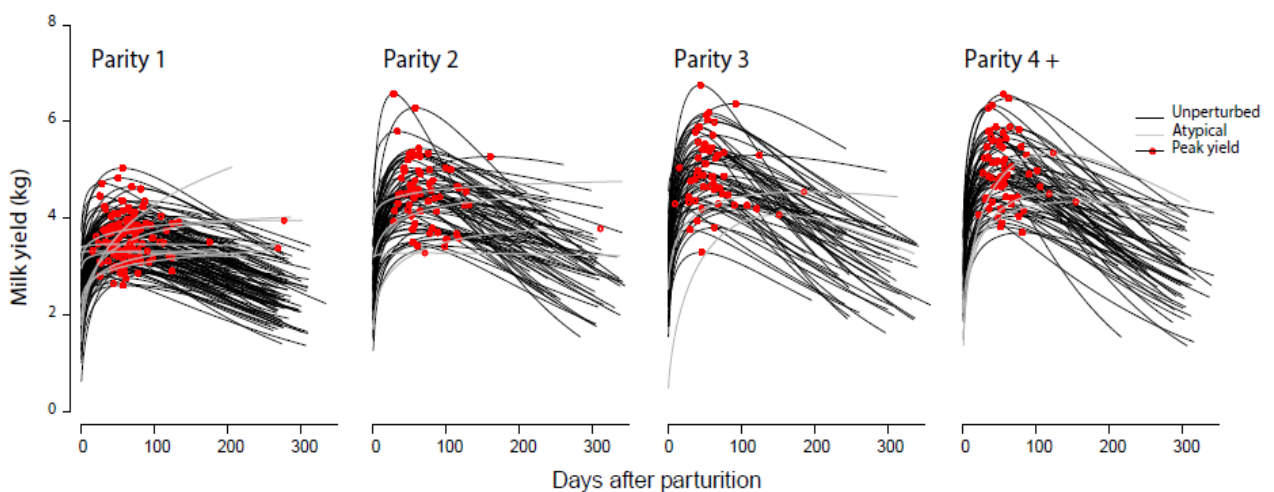

382

383 Figure 4. Individual unperturbed curves extracted from data after removal of the estimated  
384 perturbations using PLM for increasing parity number (fit on 319 lactation data; Atypical curves  
385 correspond to outlying estimates of the parameter  $c$  governing milk persistency).

386 The Pearson linear correlation matrix by breed and parity between parameters of  $PLM_N^*$  is  
387 shown in Figure 5 (panels a and b). A strong negative correlation was found between  $a$  and  $b$   
388 (-0.65), indicating that high values of  $a$  (scaling of the lactation curve), were associated with  
389 low values of  $b$  (shaping the curve). A positive correlation was found between the parameters  
390  $c$  and  $b$  (0.64) indicating a positive association between the shape of the curve and the rate of  
391 decrease of lactation. Finally, a low negative correlation between  $c$  and  $a$  (-0.11) was found.  
392 These results are consistent with the well-known features of lactation curves: higher milk at  
393 peak yield being associated with higher speed of decline after peak. Several factors (*e.g.* breed,  
394 parity, seasonality, and season of kidding) can affect characteristics of the lactation curve. The  
395 differences found in this study between primiparous and multiparous goats are consistent with  
396 previous studies [28, 29] with primiparous goats being less productive, with a lower peak yield  
397 and a greater persistency. Despite the lack of a significant effect of parity, our results are  
398 consistent with previous studies [29] where primiparous goats had a peak later than multiparous  
399 (see Table 2). The strong breed effect we observed on peak time is consistent with previous  
400 studies [29] with Saanen goats having a peak yield later than Alpine goats.

#### 401 **Number of perturbations and milk loss**

402 The effects of parity and breed on the total number of perturbations were not significant. Total  
403 number of perturbations was 7.59 for the primiparous, 7.38 for the multiparous, 7.45 for the  
404 Alpine and 7.47 for the Saanen. By contrast, the rate of milk yield loss after perturbation was  
405 significantly affected by the parity. A Pearson linear correlation matrix by breed and parity  
406 between  $PLM_N^*$  estimates for the number of perturbations ( $N$ ), percentage loss of milk yield ( $L$ ),  
407 and goodness of fit RMSE was also carried out (Figure 5, panels c and d). A positive correlation  
408 was noted between RMSE and milk loss (0.38). However, weak negative correlations between  
409 the number of detected perturbations and RMSE (-0.16), and the number of perturbations and  
410 the milk loss (-0.20) were also noted. Distributions of  $N$ ,  $L$  and RMSE showed an even larger

411 difference according to the parity than to the breeds. These results show that it is not the number  
 412 of perturbations that contribute the most to the loss in milk yield over the lactation.

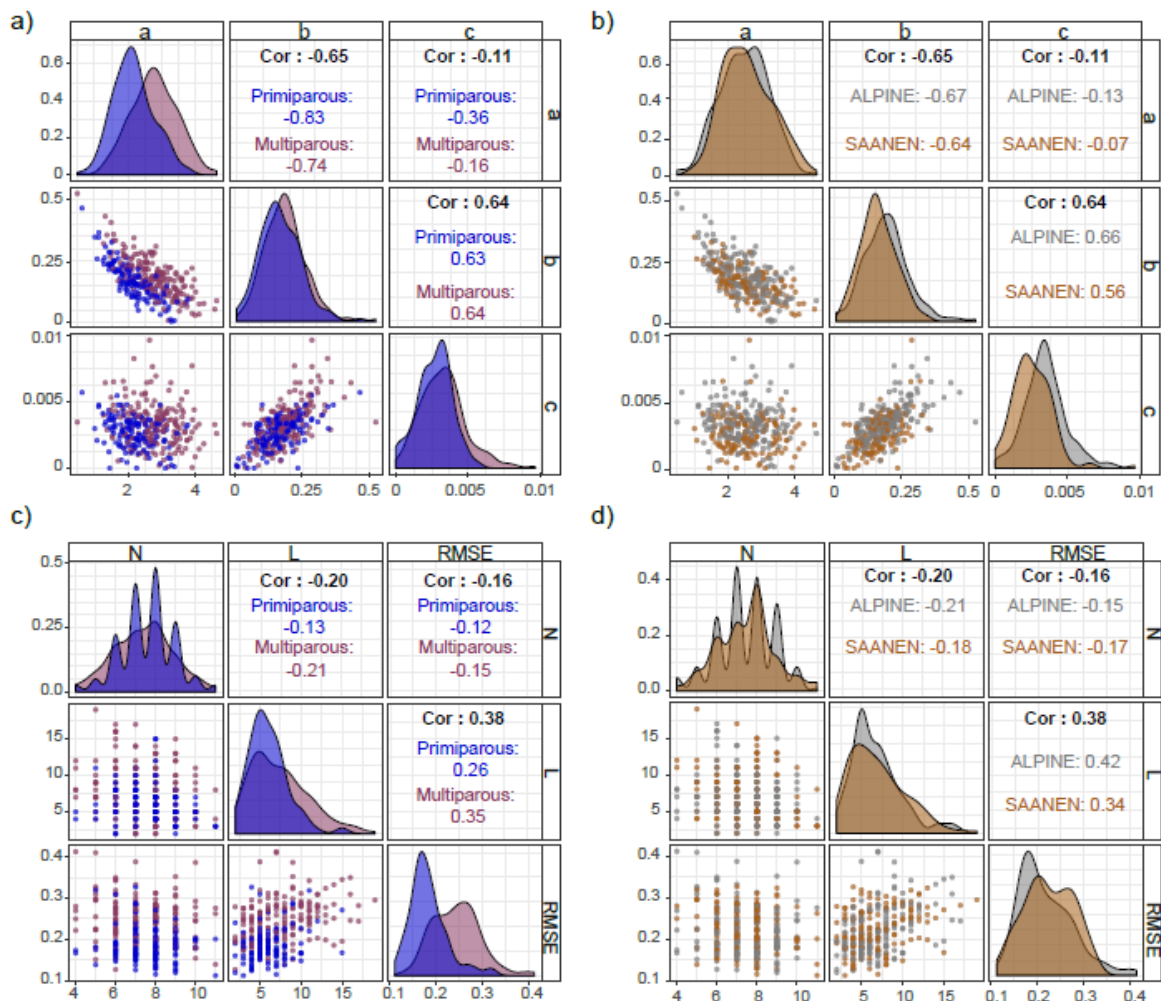

413

414 Figure 5. Pearson linear correlation matrix of PLM parameters estimates: panels (a) and (b): the  
 415 *a*, *b*, *c* parameters defining the unperturbed curve (a: by parity and b: by breed). Panels (c) and  
 416 (d): the number of perturbations *N*, milk loss and RMSE (c: by parity and d: by breed).

### 417 Perturbation timing and shape

418 Table 3 gives descriptive statistics on the parameters of PLM characterizing the 2,354  
 419 perturbations detected during the fitting procedure: time  $t_p$ , intensity  $k_0$ , collapse speed  $k_1$  and  
 420 recovery speed  $k_2$  according to the lactation stage determined with Grossman's model. Most of  
 421 the perturbations were detected during the late stage of lactation ( $n=1,063$ ). The number of  
 422 perturbations tended to decrease in middle stage ( $n=1,054$ ) and for early stage ( $n=237$ ). The  
 423 parameter  $k_0$  increased from early, middle and late lactation stage (Table 3). These results

424 suggest that throughout the lactation process, perturbations become more intense. The  
 425 parameter  $k_1$  decreased from early to late stages of lactation. This suggests that perturbations  
 426 tended to be sharper at the beginning of lactation, with a high speed of collapse and recovery,  
 427 while they tended to be smoother than the lactation progressed

428 Table 3. Descriptive statistics of perturbation parameters for the 2,354 perturbations detected  
 429 by the perturbed lactation model in the dairy goat lactation dataset.

| Perturbations  | Stage of lactation (2,354) |       |               |       |              |       |
|----------------|----------------------------|-------|---------------|-------|--------------|-------|
|                | Early (237)                |       | Middle(1,054) |       | Late (1,063) |       |
|                | Mean                       | Sd    | Mean          | sd    | Mean         | sd    |
| tp : time      | 33.8                       | 34.0  | 107           | 63.0  | 202          | 60.0  |
| k0 : intensity | 0.450                      | 0.331 | 0.506         | 0.349 | 0.672        | 0.359 |
| k1 : collapse  | 4.01                       | 4.17  | 3.41          | 3.87  | 2.76         | 3.69  |
| k2 : recovery  | 1.13                       | 1.96  | 1.18          | 1.79  | 0.95         | 1.71  |

430  
 431 The PLM parameter  $k_0$ , which drives the intensity of the perturbation, varied considerably  
 432 between 0.001 and 1 (set as a boundary). The parameter  $k_1$  (which drives the collapse speed of  
 433 the perturbation), and the parameter  $k_2$  (which drives the speed of recovery) varied between 0  
 434 and 10. A gradient according to the stage lactation was noted for these parameters. A gradual  
 435 increase in  $k_0$  and a gradual decrease in  $k_1$  and  $k_2$  according to early, middle and late lactation  
 436 stages was noted (Table 3). In the late stage, 30.20% of the perturbations were detected with a  
 437 parameter  $k_2$  equal to 0, which implied a perturbation without any recovery period. Among  
 438 these perturbations, 85.39% had a  $k_0$  value equal to 1. On the other hand, in the early and middle  
 439 stages, the perturbations detected with an  $k_2$  equal to 0 were 1.70% and 7.07%, respectively.



## 440 **Discussion**

### 441 **Combining two types of models**

442 In this study, we described the PLM model proposed as a tool for extracting simultaneously  
443 perturbed and unperturbed lactation curves from daily milk time-series. The key original feature  
444 of PLM is to combine an explicit representation of perturbations with a mathematical  
445 representation of the lactation curve.

446 Regarding the mathematical representation of the lactation curve, the structure of PLM is  
447 generic and any equation can be used to describe the general pattern of milk production  
448 throughout lactation (see appendix including Figure 4 showing illustration of results with other  
449 lactation models). The Wood model [10] was chosen in this study as it is one of the most well-  
450 known and commonly used mathematical model of lactation curve. Behind the choice of  
451 considering a general pattern of lactation that is distorted by perturbations, the biological  
452 assumption is that the dairy female has a theoretical production potential (the unperturbed  
453 curve) corresponding to the expression of its genetics in a given environment. This genetic  
454 potential may not be fully expressed in the farm environment because of perturbations (the  
455 perturbed curve).

456 Regarding the representation of perturbations, we chose an explicit formalism with a  
457 compartmental structure for every single perturbation. With this conceptual choice, PLM  
458 overcomes limitations of recent models developed for capturing perturbations [15–17]. It  
459 allows the capture of multiple perturbations with contrasted features: from a sharp and short  
460 drop (for instance due to a diarrhea episode) to a long and slow decrease (for instance due the  
461 gestation status). PLM also allows to determine the time at which the perturbations occur during  
462 the lactation. This last point is of great interest to add value to on-farm data where challenges  
463 imposed to animals do not result from controlled trials and arise from the farm environment.

464 By combining a general model of lactation curve with an explicit model of perturbations, PLM  
465 provides two key outputs: first, the unperturbed curve of the lactating female reflects its  
466 production potential in a non-perturbed environment, and second the perturbed curve which  
467 reflects the production permitted by the farm environment. The PLM parameters ( $k_{0,i}$ ,  $k_{1,i}$   
468 and  $k_{2,i}$ ) provides the most useful information on characteristics of the perturbed lactation curve  
469 including scale and shape for each perturbation. Indeed, by providing a perturbed curve, we  
470 give an estimate of the number of perturbations and for each perturbation an estimate of its time  
471 of start  $t_{p,i}$ , intensity  $k_{0,i}$ , collapse speed  $k_{1,i}$  and recovery speed  $k_{2,i}$ . This not only allows PLM  
472 to be flexible in capturing different types of perturbations (*e.g.*, gestation, drying, disease), but  
473 also to produce metrics to compare the effect of these perturbations on milk yield. In such cases,  
474 and by introducing the information concerning these perturbations as an explicit component in  
475 the Wood model, we force the model to take into account these perturbations to build the  
476 unperturbed curve.

477 With the development of on-farm technology measurements, an interesting perspective for  
478 PLM is to be used to assess other biological time-series data, such as body weight changes, dry  
479 matter intake, and hormones dynamics during lactation.

#### 480 **Fitting algorithm**

481 Beyond the original concepts behind PLM, a key methodological development has been the  
482 fitting algorithm. The number of parameters to be determined is substantially important,  
483 including the Wood parameters of the unperturbed curve (3 parameters), and PLM parameters  
484 (4 parameters for each perturbation). To overcome the difficulty of estimating a high number  
485 of parameters, a 2-step algorithm was implemented. The first step of the procedure was to  
486 determine Wood parameters and the time when the perturbation starts. The second step of the  
487 procedure was to determine PLM parameters. Another difficulty concerned the choice of a  
488 maximum number of perturbations. After several attempts, this 2-step algorithm was selected

489 for three main reasons. The first one was related to the visual quality of the fitting results itself.  
490 Indeed, the obtained fitted curve is always very close to what would have been drawn after  
491 simply looking at the raw data and wondering what the lactation curve would be without  
492 perturbations. This proximity to what could have been inferred was considered decisive, yet  
493 subjective. The second reason was related to the issue of finding the number of perturbations.  
494 The PLM procedure allows an automated determination of an optimal number of perturbations,  
495 without *a priori* estimates or use of an arbitrarily chosen stopping criterion. Preliminary results  
496 have showed that allowing a maximal number of 15 perturbations to be detected in the first step  
497 of the algorithm was enough for the considered dataset. The third reason pertained to the model  
498 parameters identifiability issue [22]. Since the fitting is based on a huge number of repeated  
499 fittings from which the systematically detected times of perturbations are retained, the 2-step  
500 fitting algorithm facilitates the practical identifiability of the model parameters. Indeed, the  
501 overall fitting algorithm was applied several times to the same dataset. Given that obtained  
502 parameter estimates were the same between the different runs, not only it strengthens the  
503 convergence properties of the algorithm but also it guarantees model parameters identifiability.  
504 Fitting results (see Figure 6) have shown that, in some cases, parameter estimates characterizing  
505 an individual perturbation reached their initial upper boundaries (1 for parameter  $k_{0,i}$  and 10  
506 for parameters  $k_{1,i}$  and  $k_{2,i}$ ). This situation concerns perturbations with a narrow and deep peak-  
507 shape. By construction, the value of the parameter  $k_0$  (intensity of the perturbation) is a  
508 proportion and thus not supposed to exceed 1. For the parameters  $k_1$  and  $k_2$ , a value of 10  
509 already represents a very abrupt collapse or recovery, respectively. These results are therefore  
510 considered relevant. However, a next step may be to test the model on a larger dataset to assess  
511 the need to broaden these boundaries. Furthermore, another working step will consist in  
512 developing an application where the settings of the PLM algorithm can be user-defined. For

513 instance, the maximal number of detectable perturbations, the size of the search grid in step  
 514 one, or boundaries of parameters.

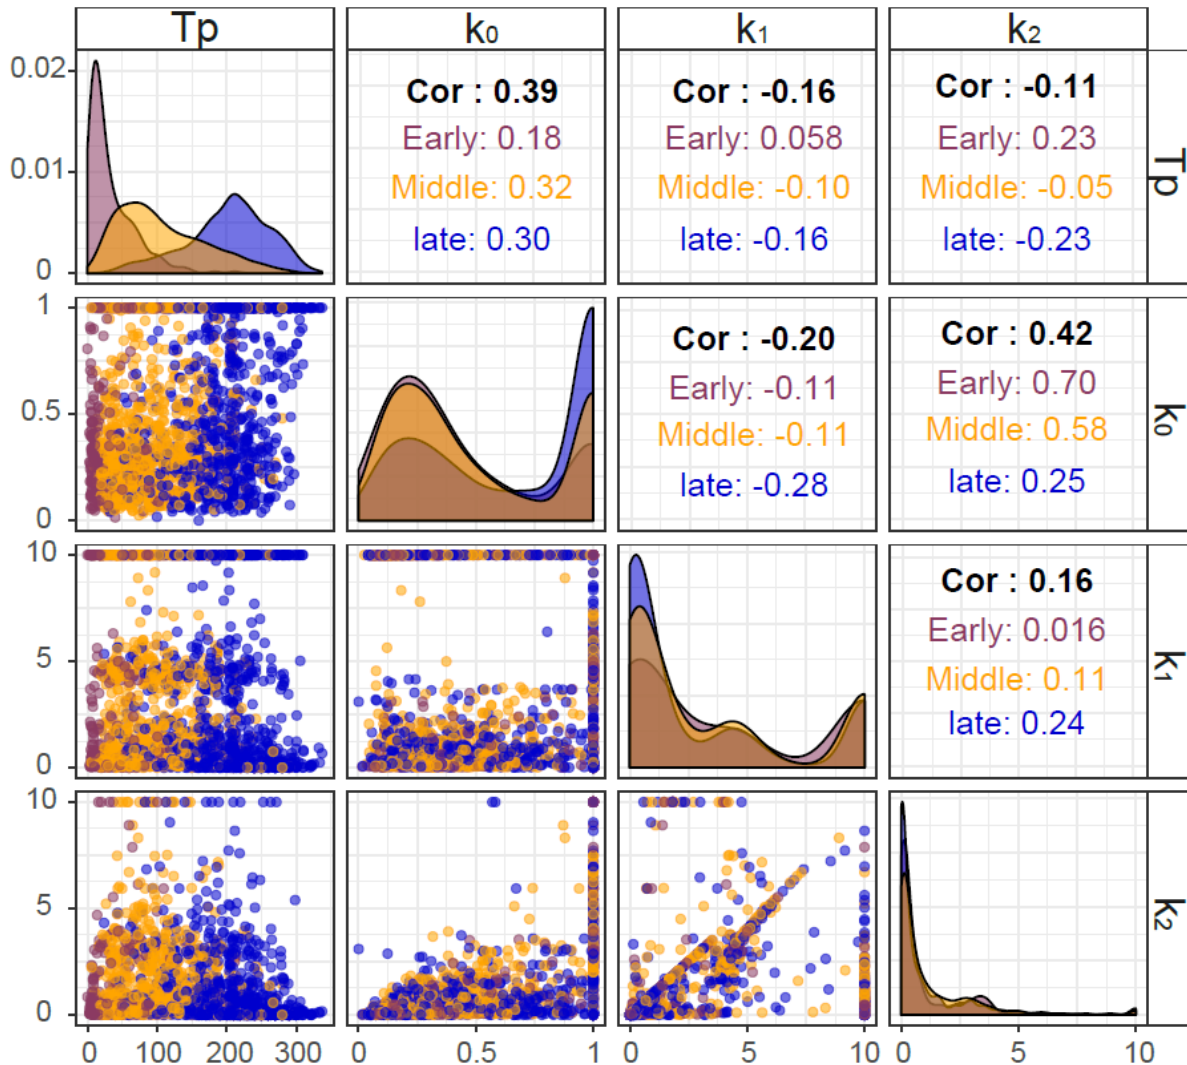

515

516 Figure 6. Pearson linear correlation matrix on the PLM parameters by stage of lactation:  $tp$ :  
 517 perturbations times detected;  $k_0$ : intensity,  $k_1$ : collapse and  $k_2$ : recovery of perturbation.

### 518 Phenotyping tool

519 PLM was developed to improve the ability to phenotype animals by extracting biological  
 520 meaningful information from raw data. The unperturbed curve fitted by PLM makes it possible  
 521 to compare animals based on their potential of milk production. With this information, animals  
 522 can be ranked based on the production level they would have achieved in a non-perturbed  
 523 environment, instead of being ranked based on the measured production level assuming no

524 perturbations were encountered. This ranking may be of interest for the farmer's breeding  
525 strategy, avoiding the culling of animals that have faced a challenge decreasing their production  
526 milk while still having high genetic merit.

527 The perturbed curve and the characteristics of each perturbation (time, intensity, collapse and  
528 recovery) open the perspective of working on perturbations as such and using this information  
529 for breeding and management. As a phenotyping tool, PLM can be useful for genetic selection.

530 Studying characteristics of perturbations throughout many lactations of a large number of  
531 individuals and linking them to genetic or genomic information opens perspectives to evaluate  
532 their heritability and their potential genetic impact. PLM can also be a valuable tool for on-farm

533 management. Linking perturbations with other information on the animals, such as lactation  
534 stage, parity, gestation stage, can help to detect sensitive periods where perturbations are more  
535 likely to occur. By cross-checking information on perturbations from all animals with

536 information on the farm environment (for instance temperature, feed availability), it would be  
537 possible to detect synchronous occurrences of perturbations and link them to farm environment  
538 or management practices during times of stress. With this better understanding of

539 environmental effects on animal production, preventive measures on the farm could be made.  
540 Understanding the effects of the environment on farm animals and understanding how they  
541 cope with perturbations during crucial times could help to gain insights on resilience and

542 robustness. These complex dynamic properties are highly desirable to face the changes  
543 occurring in the livestock sector [30]. While the conceptual framework to work on resilience  
544 and robustness is now well defined in animal sciences, we still need operational metrics [31].

545 Such metrics have been proposed for a single perturbation by Revilla et al., [15] and Sadoul et  
546 al. [17]. Taking into account this type of information can provide a proxy to estimate the  
547 frequency and severity of disorders such as clinical mastitis [32]. Studying perturbations in

548 lactation curves also makes it possible to compare animals facing the same stress and detect the

549 ones with the greatest adaptive capacities. Finally, the on-farm early detection of perturbations  
550 in milk yield can provide farmers with an alert system on udder health. Recently, Huybrechtset  
551 al. [33] tested and developed the synergistic control concept for early detection of milk  
552 abnormalities in dairy cows based on detection of shifts in milk yield per hour. Of the 49  
553 mastitis cases, 31 cases were detected using this methodology at the same time or earlier than  
554 they were detected by the farmer.

555 To our knowledge, existing metrics for dropped milk yields per day in the lactation curve, as  
556 proposed by Elgersma et al. [11], are based on a variance approach applied to the whole curve.  
557 Fluctuations in milk yield are summarized with a single statistical measure. Complementary to  
558 this type of approach, PLM can decompose the whole curve and characterize each perturbation,  
559 with metrics that are consistent with the concept of resilience of each and subsequent  
560 perturbation. The PLM model offers a way of quantifying the consequences of external factors  
561 and exploring hypotheses about the biological types of responses due to specific perturbations.  
562 By giving a biological meaning to these parameters, we can reconcile a phenotyping tool with  
563 the opportunity of an explanatory selection approach.

564 A major limitation of PLM results in its dependency to the quality of data. Indeed, if data are  
565 recorded with a low accuracy (due to technical problems of measurements), the outputs of PLM  
566 do not have consistency as detected perturbations have nothing to do with perturbations of the  
567 lactation curve, but are related to accuracy problem. In addition, PLM has been developed with  
568 daily records. It will be necessary to evaluate if PLM can operate correctly with less frequent  
569 data. Finally, PLM is based on the concept of a theoretical unperturbed curve of milk  
570 production, considered as a potential, and used to determine deviations that reflect  
571 perturbations. This rationale for an underlying potential is debatable from a biological point of  
572 view. Nevertheless, from a strict mathematical point of view, we considered this approach as

573 valuable to provide a tool for interpreting data. The application of PLM on other datasets from  
574 other species could provide information to further evaluate this point.

## 575 **Conclusion**

576 By combining a general description of the lactation curve with an explicit representation of  
577 perturbations, the PLM model allows the characterization of the potential effects on milk  
578 production, allowing to assess animal genetics, and the deviations induced by the environment,  
579 reflecting how animals cope with real farm conditions. The translation of raw time series data  
580 into quantitative indicators makes it possible to compare animals' phenotypic potential and  
581 bring insights on their resilience to external factors. In that sense, PLM could be used as a  
582 valuable phenotyping tool and it contributes to provide decision solutions for dairy production  
583 that are grounded in a biologically meaningful framework. Further modelling studies should  
584 strive for integrating high throughput data analysis with such biological framework.

## 585 **Acknowledgments**

586 We gratefully acknowledge the team at the INRA UMR 791 Modélisation Systémique  
587 Appliquée aux Ruminants (Paris, France) experimental installation for the care of the animals  
588 and their work to provide robust performance data. Special thanks to Dr. R. Muñoz-Tamayo for  
589 his conscientious reading and meticulous corrections of the manuscript. This work was carried  
590 out with the financial support of the ANR- Agence Nationale de la Recherche – The French  
591 National Research Agency under the “Deffilait project” (ANR; project: ANR-15-CE20-0014).

592

## 593 **References**

- 594 1. Adriaens I, Huybrechts T, Aernouts B, Geerinckx K, Piepers S, De Ketelaere B, et al.  
595 Method for short-term prediction of milk yield at the quarter level to improve udder  
596 health monitoring. *J Dairy Sci.* 2018; 101: 10327–10336. doi:10.3168/jds.2018-14696
- 597 2. Huxley JN. Impact of lameness and claw lesions in cows on health and production.  
598 *Livestock Sci.* 2013; 156: 64–70. doi:10.1016/j.livsci.2013.06.012
- 599 3. West JW. Effects of Heat-Stress on Production in Dairy Cattle. *J Dairy Sci.* 2003; 86:  
600 2131–2144. doi:10.3168/jds.S0022-0302(03)73803-X

- 601 4. Friggens NC, Duvaux-Ponter C, Etienne MP, Mary-Huard T, Schmidely P.  
602 Characterizing individual differences in animal responses to a nutritional challenge:  
603 Toward improved robustness measures. *J Dairy Sci.* 2016; 99: 2704–2718.  
604 doi:10.3168/jds.2015-10162
- 605 5. Pond CM. The significance of lactation in the evolution of mammals. *Evolution.* 1977;  
606 31: 177–199. doi:10.1111/j.1558-5646.1977.tb00995.x
- 607 6. Coulon JB, Pérochon L, Lescourret F. Modelling the effect of the stage of pregnancy on  
608 dairy cows' milk yield. *Animal Sci.* 1995; 60: 401–408.  
609 doi:10.1017/S1357729800013278
- 610 7. Dijkstra J, France J, Dhanoa MS, Maas JA, Hanigan MD, Rook AJ, et al. A Model to  
611 Describe Growth Patterns of the Mammary Gland During Pregnancy and Lactation. *J*  
612 *Dairy Sci.* 1997; 80: 2340–2354. doi:10.3168/jds.S0022-0302(97)76185-X
- 613 8. Grossman M, Koops WJ. Modeling Extended Lactation Curves of Dairy Cattle: A  
614 Biological Basis for the Multiphasic Approach1. *J Dairy Sci.* 2003; 86: 988–998.  
615 doi:10.3168/jds.S0022-0302(03)73682-0
- 616 9. Delage J, Leroy AM, Poly J. Une étude sur les courbes de lactation. *Annales de*  
617 *zootechnie.* 1953. pp. 225–267.
- 618 10. Wood P. Algebraic model of the lactation curve in cattle. *Nature.* 1967;216: 164.
- 619 11. Elgersma GG, de Jong G, van der Linde R, Mulder HA. Fluctuations in milk yield are  
620 heritable and can be used as a resilience indicator to breed healthy cows. *J Dairy Sci.*  
621 2018; 101: 1240–1250. doi:10.3168/jds.2017-13270
- 622 12. Codrea MC, Højsgaard S, Friggens NC. Differential smoothing of time-series  
623 measurements to identify disturbances in performance and quantify animal response  
624 characteristics: An example using milk yield profiles in dairy cows1. *J Animal Sci.* 2011;  
625 89: 3089–3098. doi:10.2527/jas.2010-3753
- 626 13. Gaddour A, Najari S, Ouni M. Dairy performances of the goat genetic groups in the  
627 southern Tunisian. *Agricultural J.* 2007; 2: 248–253. doi:aj.2007.248.253
- 628 14. Lescourret F, Coulon JB. Modeling the Impact of Mastitis on Milk Production by Dairy  
629 Cows. *J Dairy Sci.* 1994; 77: 2289–2301. doi:10.3168/jds.S0022-0302(94)77172-1
- 630 15. Revilla M, Friggens NC, Broudiscou LP, Lemonnier G, Blanc F, Ravon L, et al. Towards  
631 the quantitative characterisation of piglets' robustness to weaning: a modelling approach.  
632 *Animal.* 2019; 1–11. doi:10.1017/S1751731119000843
- 633 16. Nguyen Ba H, Van Milgen J, Taghipoor M. A procedure to quantify the feed intake  
634 response of growing pigs to perturbations. *Animal.* 2019;
- 635 17. Sadoul B, Martin O, Prunet P, Friggens NC. On the Use of a Simple Physical System  
636 Analogy to Study Robustness Features in Animal Sciences. Pant AB, editor. *PLOS ONE.*  
637 2015;10: e0137333. doi:10.1371/journal.pone.0137333



- 638 18. Casado C, Piquer O, Cervera C, Pascual JJ. Modelling the lactation curve of rabbit does:  
639 Towards a model including fit suitability and biological interpretation. *Livestock Sci.*  
640 2006; 99: 39–49. doi:10.1016/j.livprodsci.2005.05.019
- 641 19. Ruiz R, Oregui LM, Herrero M. Comparison of Models for Describing the Lactation  
642 Curve of Latxa Sheep and an Analysis of Factors Affecting Milk Yield. *J Dairy Sci.* 2000;  
643 83: 2709–2719. doi:10.3168/jds.S0022-0302(00)75165-4
- 644 20. Beever DE, Rook AJ, France J, Dhanoa MS, Gill M. A review of empirical and  
645 mechanistic models of lactational performance by the dairy cow. *Livestock Prod Sci.*  
646 1991; 29: 115–130.
- 647 21. France J, Thornley JH. *Mathematical models in agriculture.* Butterworths. 1984.
- 648 22. Muñoz-Tamayo R, Puillet L, Daniel JB, Sauvant D, Martin O, Taghipoor M, et al.  
649 Review: To be or not to be an identifiable model. Is this a relevant question in animal  
650 science modelling? *Animal.* 2018;12: 701–712. doi:10.1017/S1751731117002774
- 651 23. Bellu G, Saccomani MP, Audoly S, D'Angiò L. DAISY: A new software tool to test  
652 global identifiability of biological and physiological systems. *Computer Methods and*  
653 *Programs in Biomedicine.* 2007; 88: 52–61. doi:10.1016/j.cmpb.2007.07.002
- 654 24. Padfield D, Matheson G. nls. multstart: robust non-linear regression using AIC scores. R  
655 package version. 2018;1.
- 656 25. Akaike H. A new look at the statistical model identification, *IEEE T. Automat. Contr.*, 19,  
657 716–723. 1974;
- 658 26. Grossman M, Hartz SM, Koops WJ. Persistency of Lactation Yield: A Novel Approach. *J*  
659 *Dairy Sci.* 1999; 82: 2192–2197. doi:10.3168/jds.S0022-0302(99)75464-0
- 660 27. Martin O, Sauvant D. Metaanalysis of Input/Output Kinetics in Lactating Dairy Cows. *J*  
661 *Dairy Sci.* 2002; 85: 3363–3381. doi:10.3168/jds.S0022-0302(02)74424-X
- 662 28. Arnal M, Robert-Granié C, Larroque H. Diversity of dairy goat lactation curves in France.  
663 *J Dairy Sci.* 2018; 101: 11040–11051. doi:10.3168/jds.2018-14980
- 664 29. Gipson T, Grossman M. Lactation curves in dairy goats: a review. *Small Ruminant*  
665 *Research.* 1990; 3: 383–396. doi:10.1016/0921-4488(90)90019-3
- 666 30. Dumont B, González-García E, Thomas M, Fortun-Lamothe L, Ducrot C, Dourmad JY, et  
667 al. Forty research issues for the redesign of animal production systems in the 21st century.  
668 *Animal.* 2014; 8: 1382–1393. doi:10.1017/S1751731114001281
- 669 31. Friggens NC, Blanc F, Berry DP, Puillet L. Review: Deciphering animal robustness. A  
670 synthesis to facilitate its use in livestock breeding and management. *Animal.* 2017; 11:  
671 2237–2251. doi:10.1017/S175173111700088X
- 672 32. Erb HN, Smith RD, Oltenacu PA, Guard CL, Hillman RB, Powers PA, et al. Path Model  
673 of Reproductive Disorders and Performance, Milk Fever, Mastitis, Milk Yield, and  
674 Culling in Holstein Cows. *J Dairy Sci.* 1985; 68: 3337–3349. doi:10.3168/jds.S0022-  
675 0302(85)81244-3

- 676 33. Huybrechts T, Mertens K, De Baerdemaeker J, De Ketelaere B, Saeys W. Early warnings  
677 from automatic milk yield monitoring with online synergistic control. *J Dairy Sci.* 2014;  
678 97: 3371–3381. doi:10.3168/jds.2013-6913
